# Supplementary material for: Characterizing PFAS hazards and risks: a human population-based in vitro cardiotoxicity assessment strategy
Source: PubMed Central journal article supplement (PMC11368000; doi:10.1186/s40246-024-00665-x), 2024-09-02

**$\log_{10}(\text{lambdamin})=3.1$**

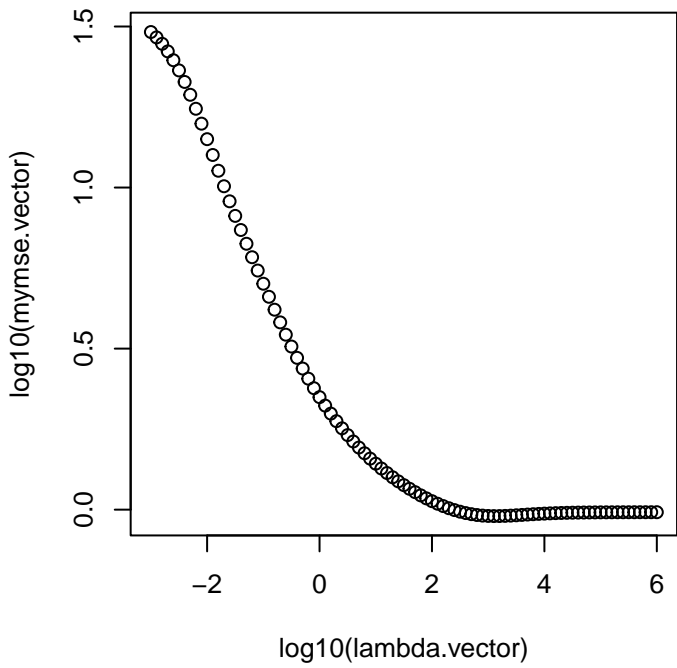

Decay\_Rise\_Ratio\_Up\_Med\_POD\_1083

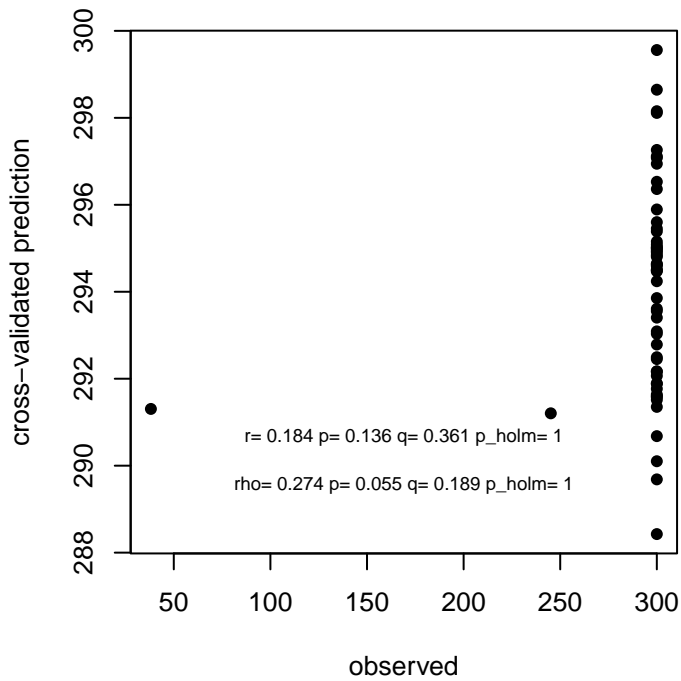

Decay\_Rise\_Ratio\_Up\_Med\_POD\_1118

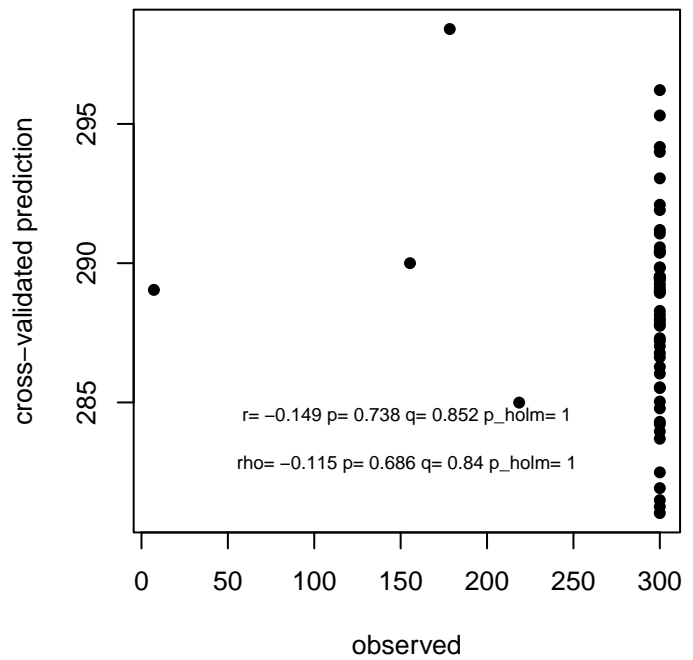

Decay\_Rise\_Ratio\_Up\_Med\_POD\_1309

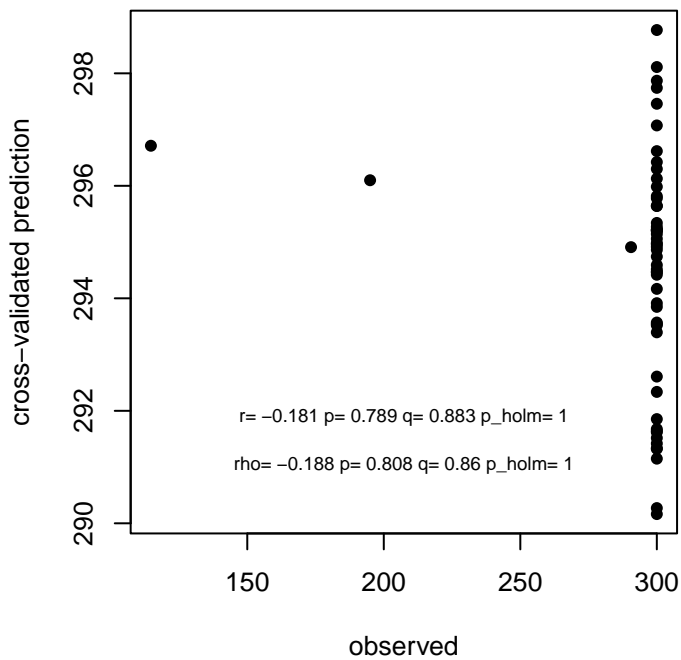

Decay\_Rise\_Ratio\_Up\_Med\_POD\_1368

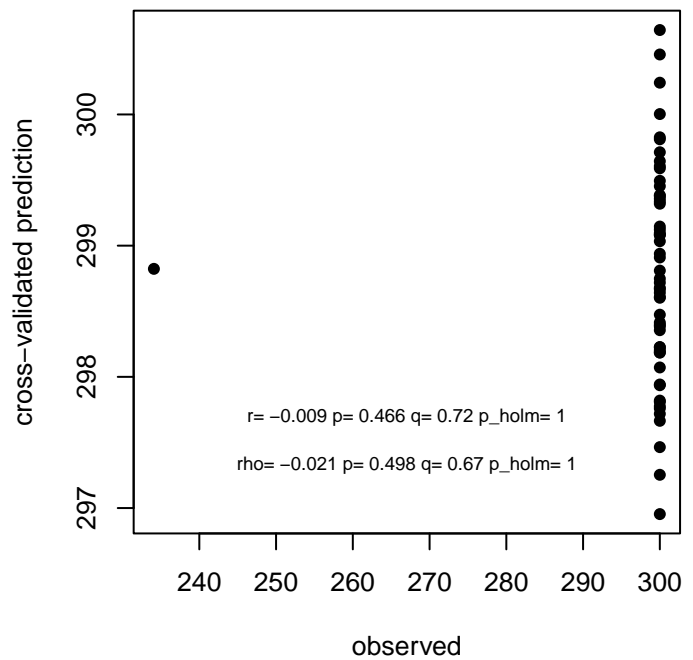

Decay\_Rise\_Ratio\_Up\_Med\_POD\_1392

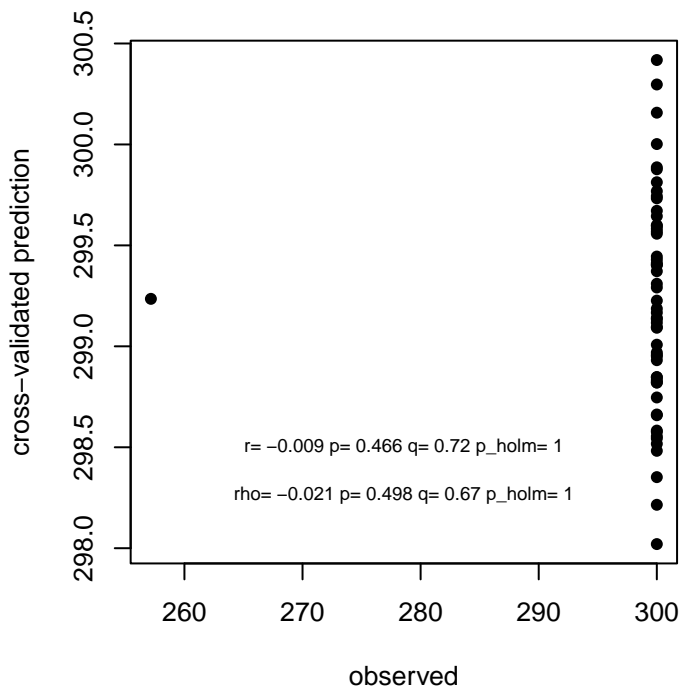

Decay\_Rise\_Ratio\_Up\_Med\_POD\_1434

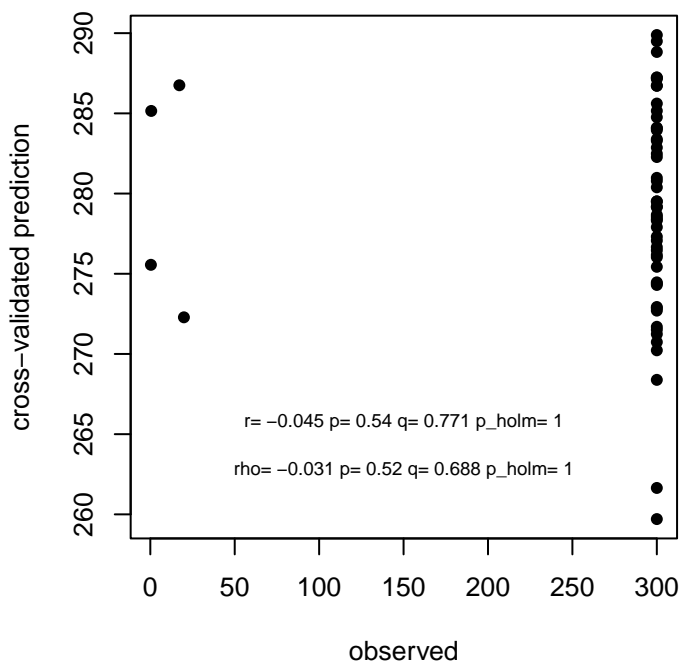

Decay\_Rise\_Ratio\_Up\_Med\_POD\_1516

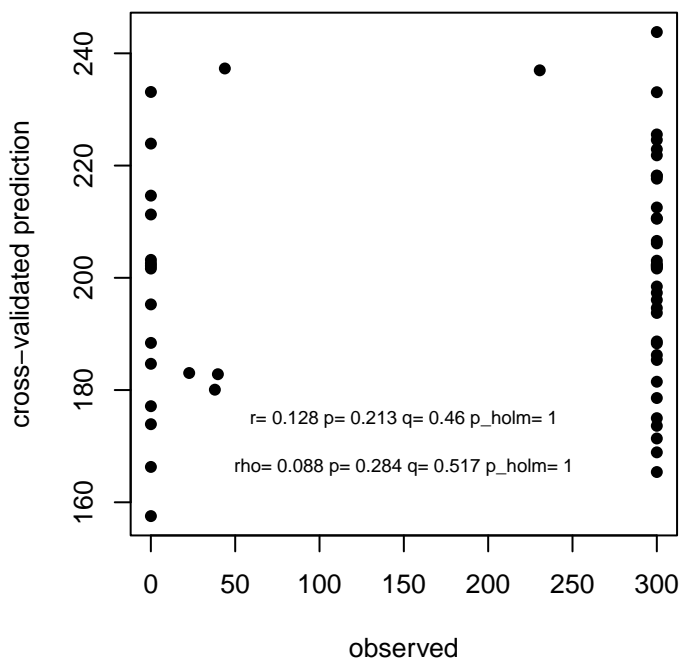

Decay\_Rise\_Ratio\_Up\_Med\_POD\_1518

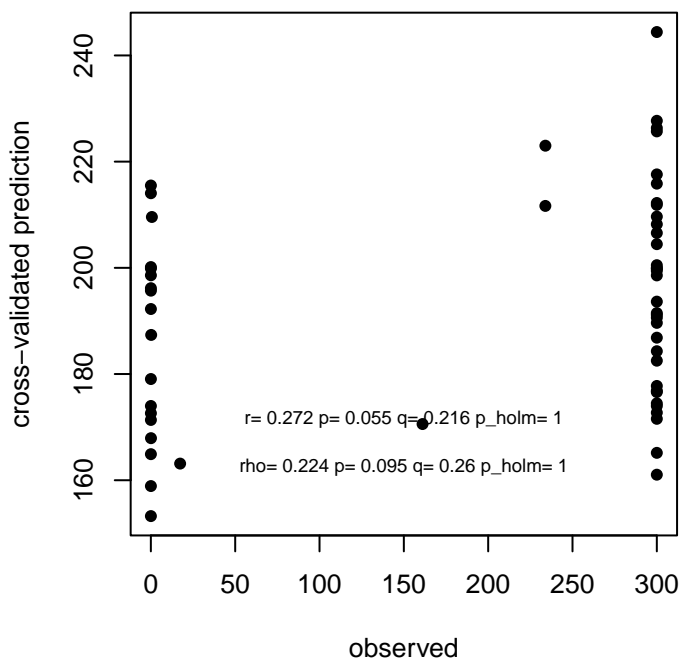

Decay\_Rise\_Ratio\_Up\_Med\_POD\_1531

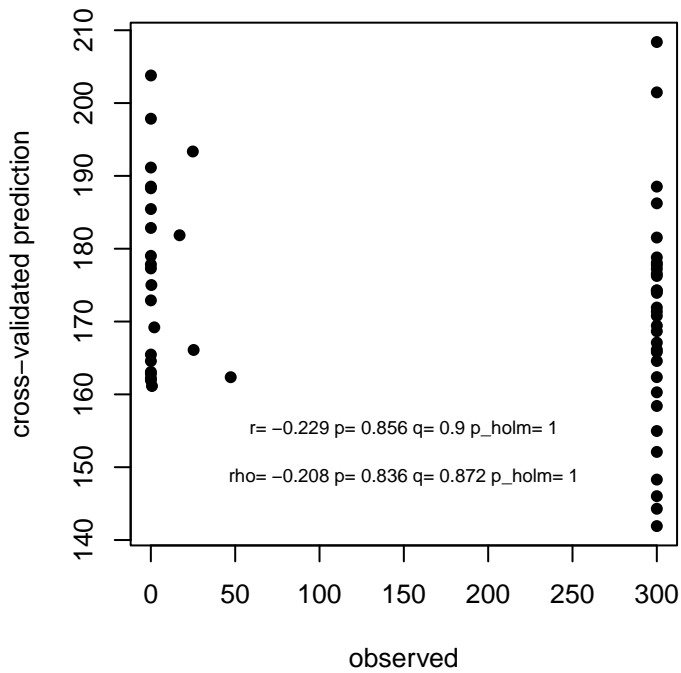

Decay\_Rise\_Ratio\_Up\_Med\_POD\_1535

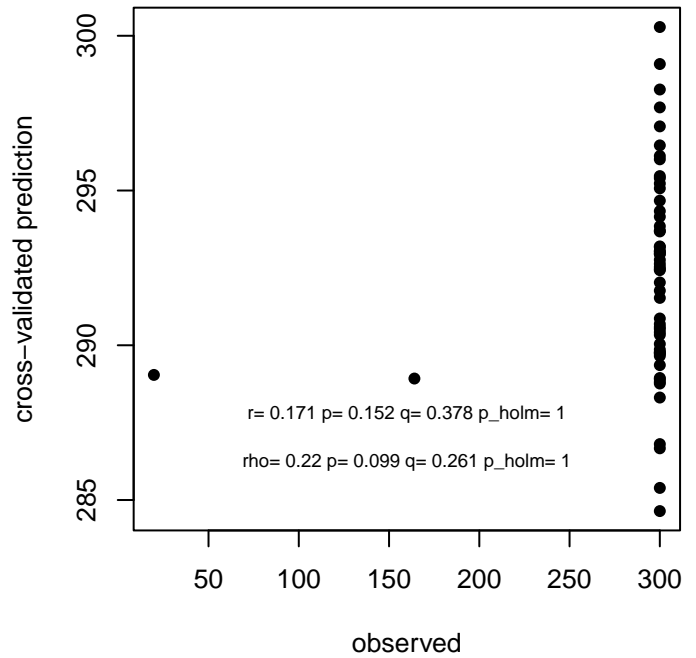

Decay\_Rise\_Ratio\_Up\_Med\_POD\_1565

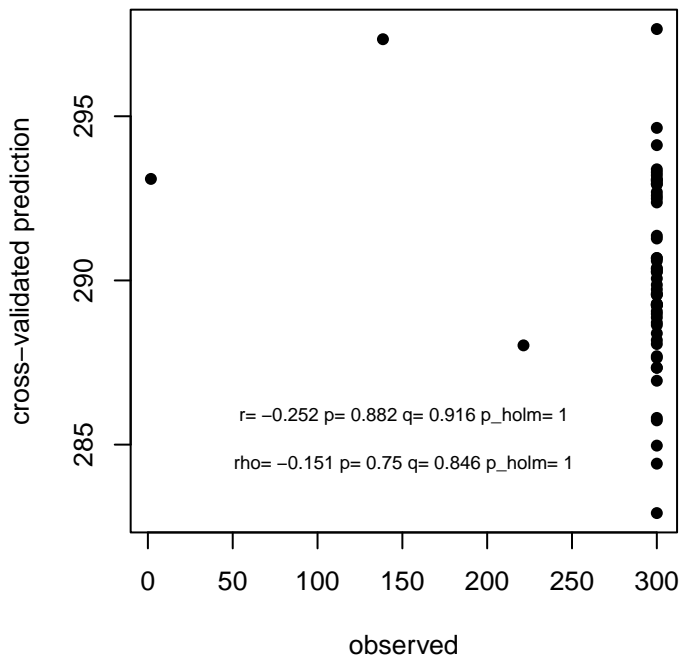

Decay\_Rise\_Ratio\_Up\_Med\_POD\_11235

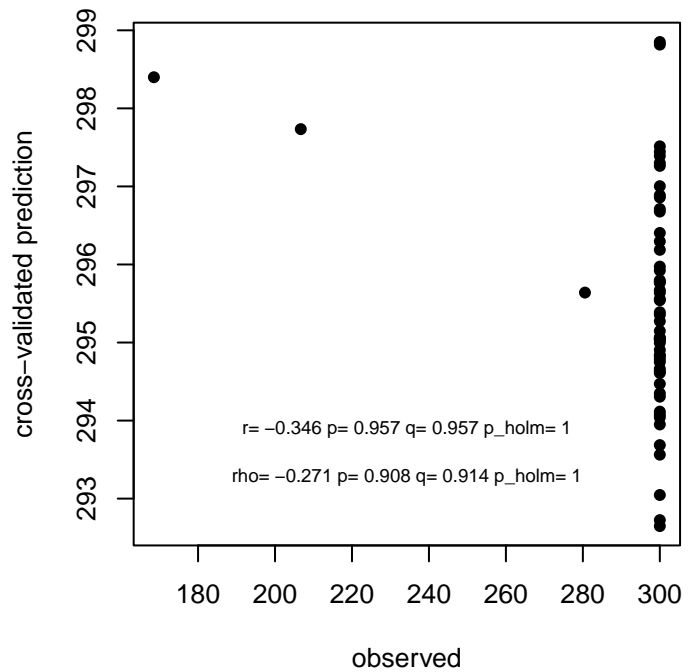

Decay\_Rise\_Ratio\_Up\_Med\_POD\_20032

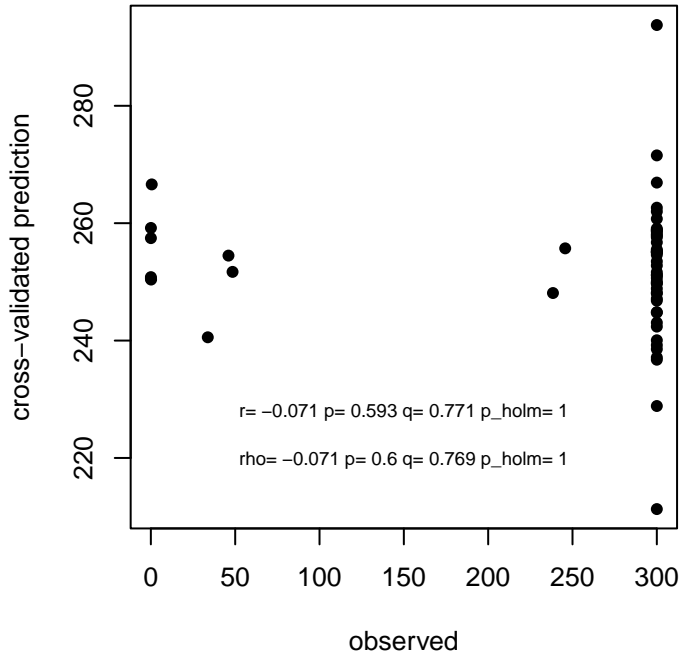

Decay\_Rise\_Ratio\_Up\_Med\_POD\_20084

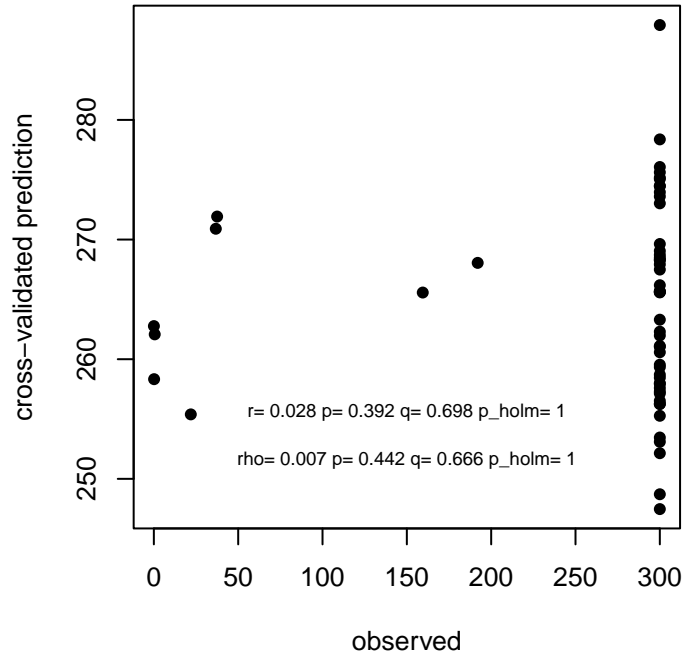

Decay\_Rise\_Ratio\_Up\_Med\_POD\_30145

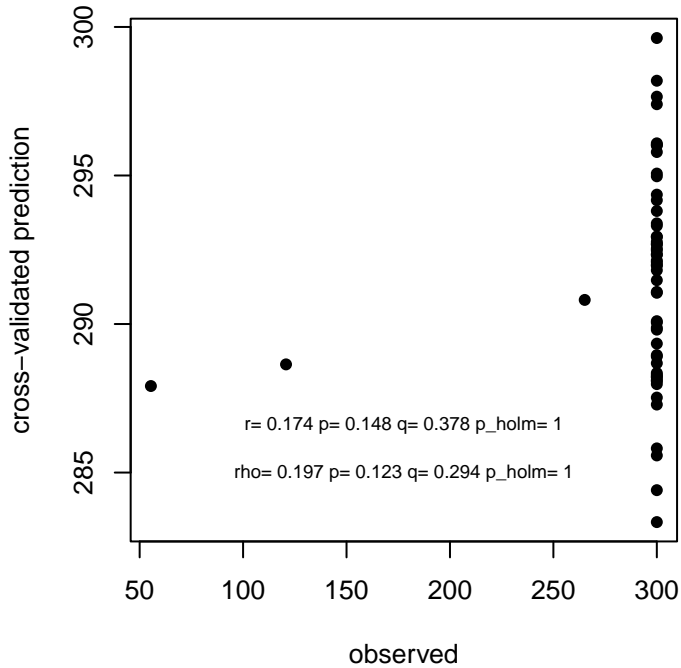

Decay\_Rise\_Ratio\_Up\_Med\_POD\_30171

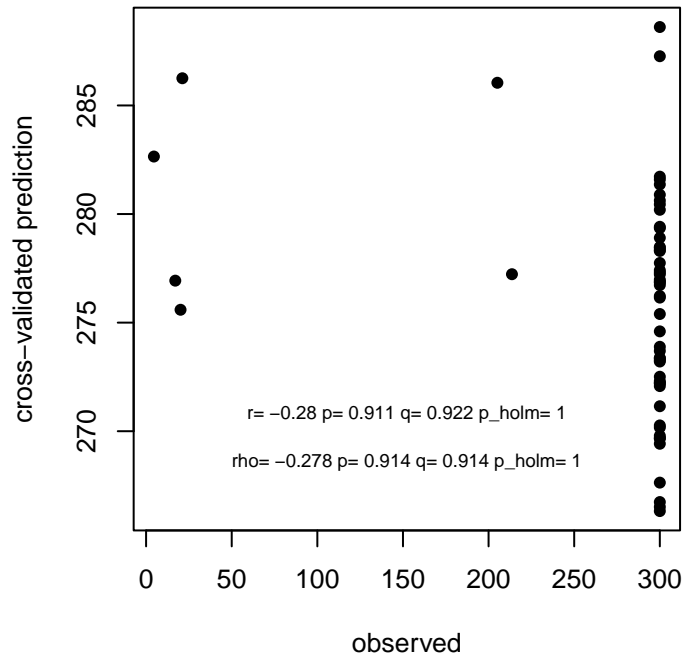

**Decay\_Rise\_Ratio\_Min\_POD\_alldonors**

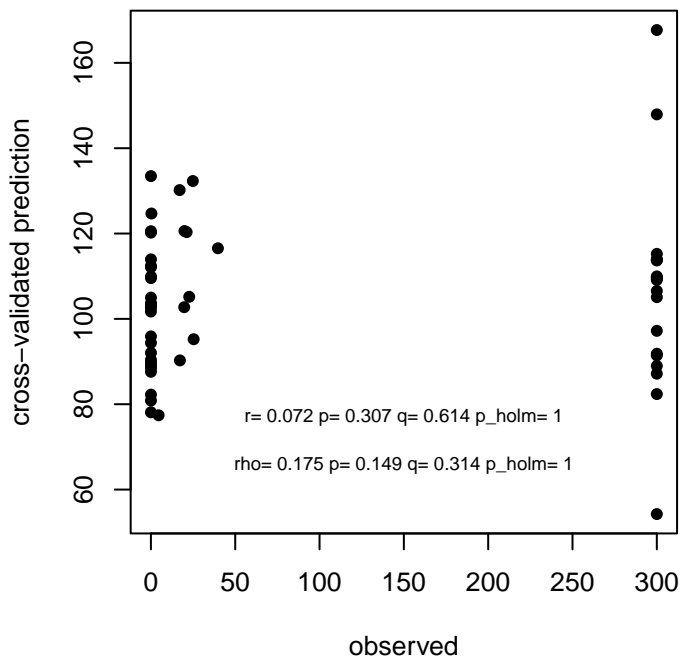

**Peak\_Freq\_Down\_Med\_POD\_1083**

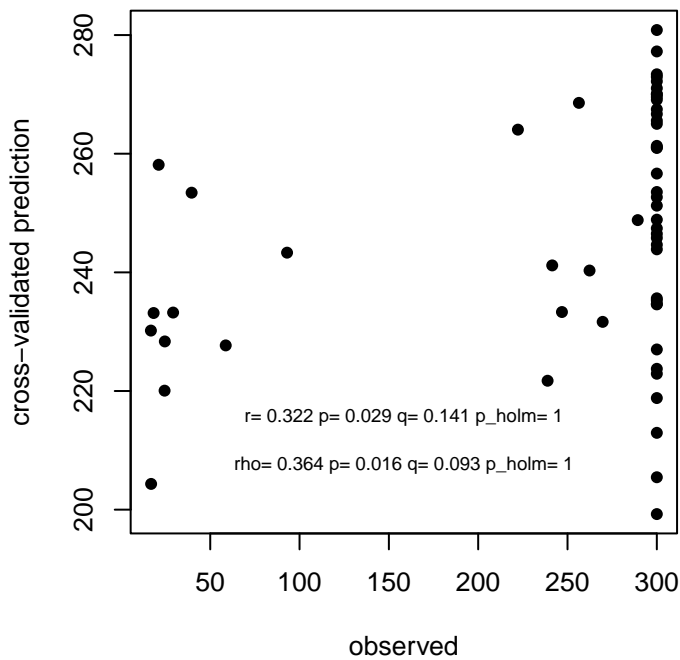

**Peak\_Freq\_Down\_Med\_POD\_1118**

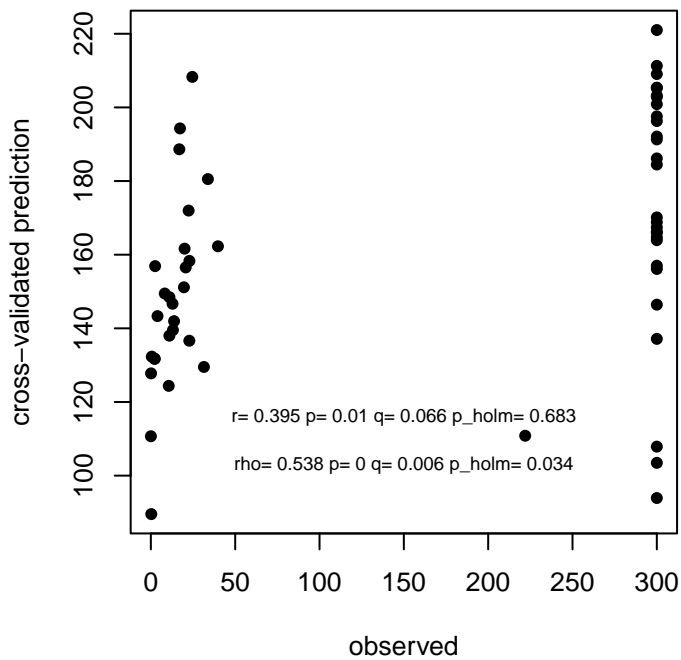

**Peak\_Freq\_Down\_Med\_POD\_1309**

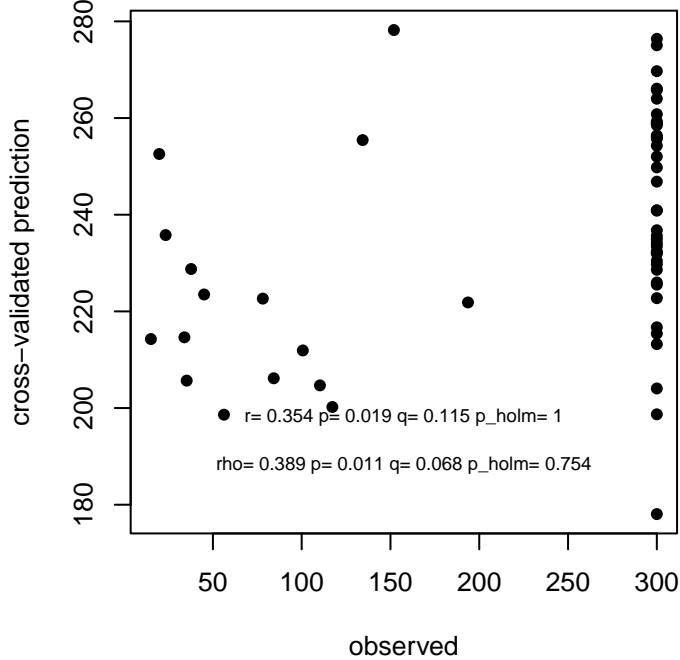

Peak\_Freq\_Down\_Med\_POD\_1368

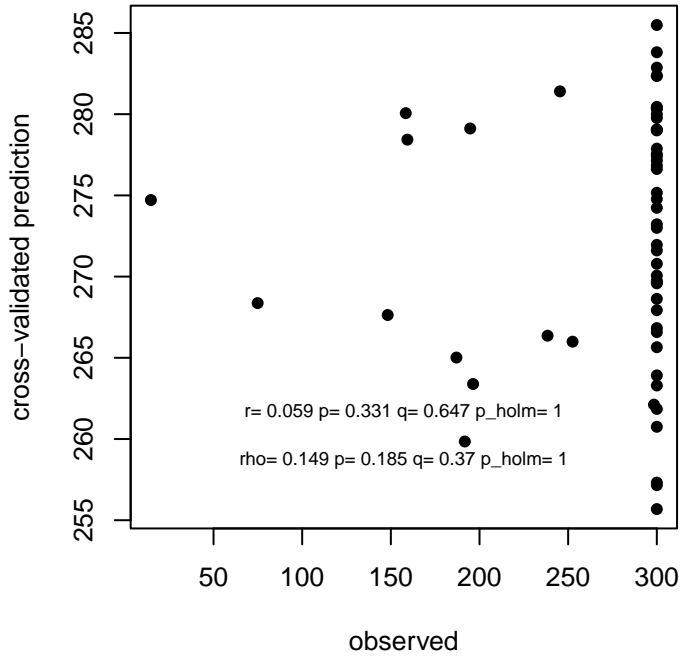

Peak\_Freq\_Down\_Med\_POD\_1392

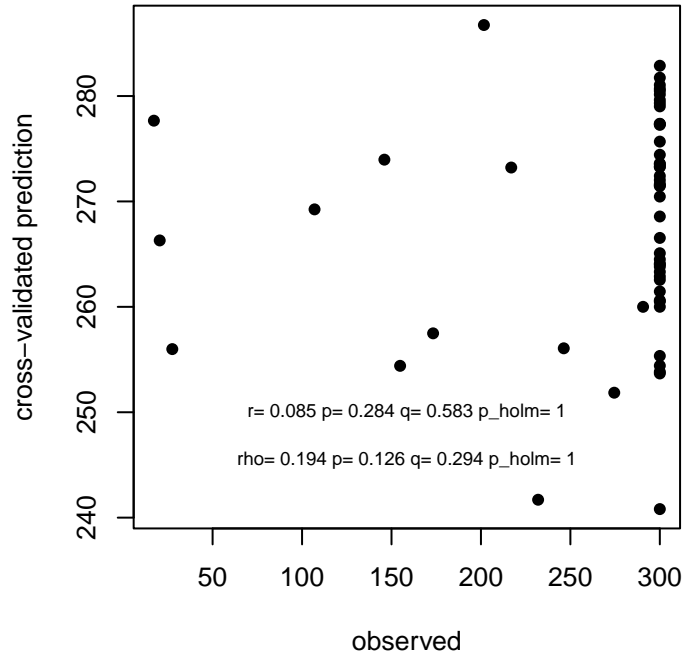

Peak\_Freq\_Down\_Med\_POD\_1434

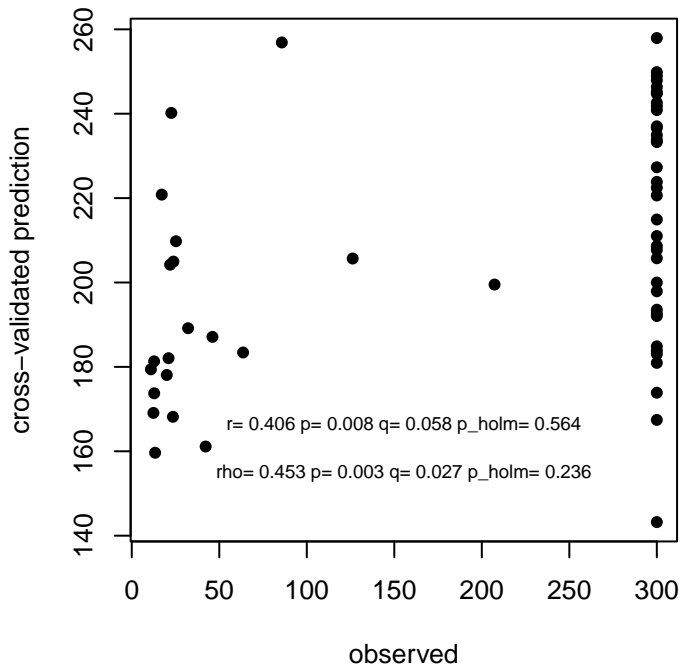

Peak\_Freq\_Down\_Med\_POD\_1516

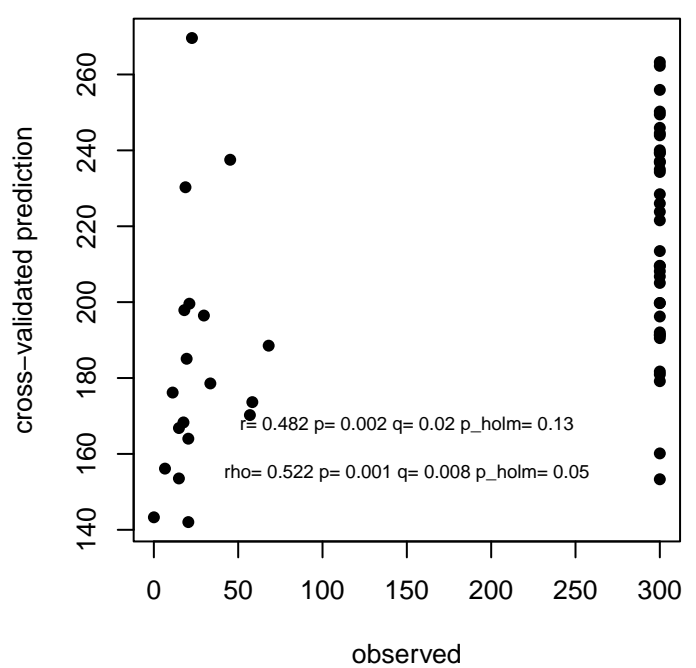

Peak\_Freq\_Down\_Med\_POD\_1518

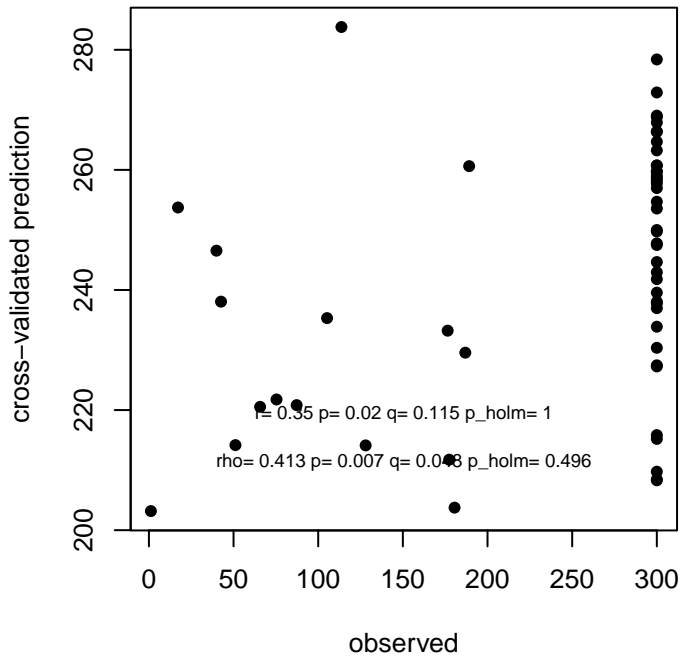

Peak\_Freq\_Down\_Med\_POD\_1531

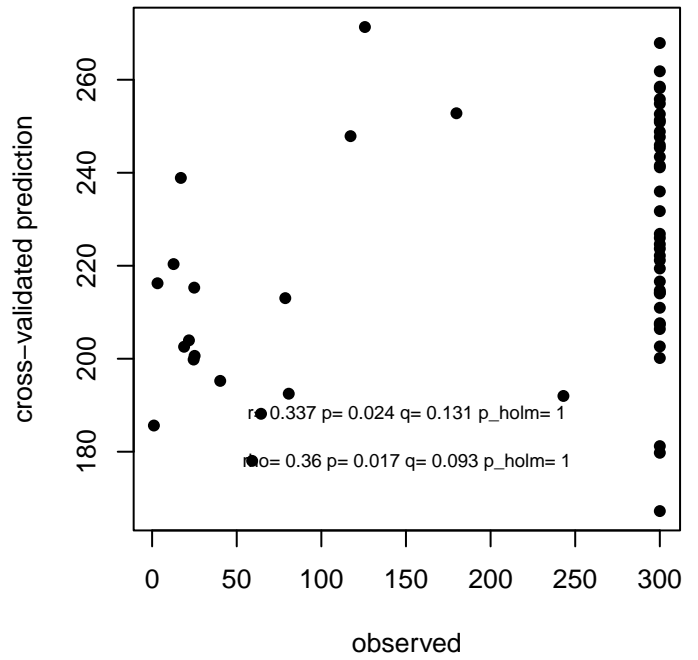

Peak\_Freq\_Down\_Med\_POD\_1535

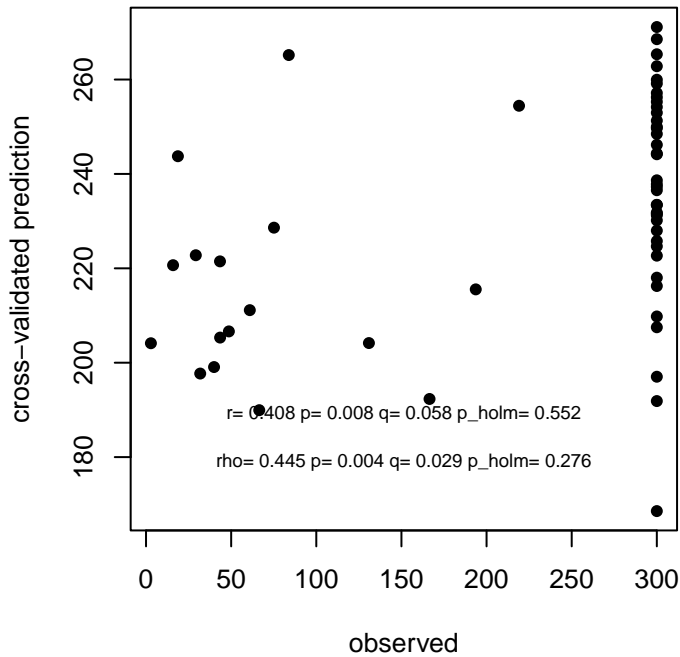

Peak\_Freq\_Down\_Med\_POD\_1565

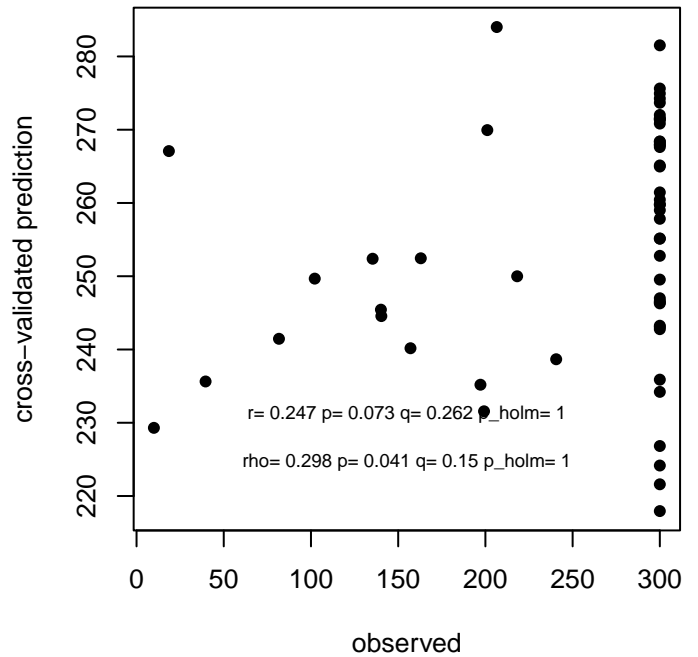



Peak\_Freq\_Down\_Med\_POD\_11235

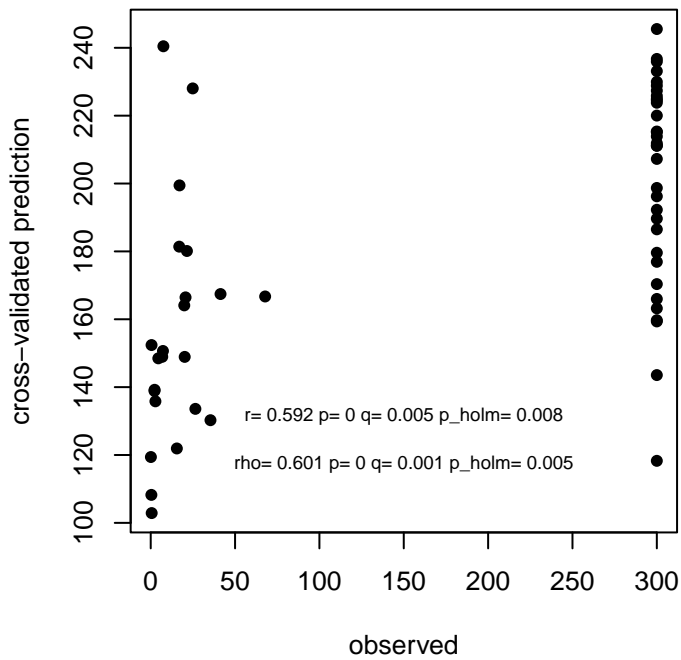

Peak\_Freq\_Down\_Med\_POD\_20032

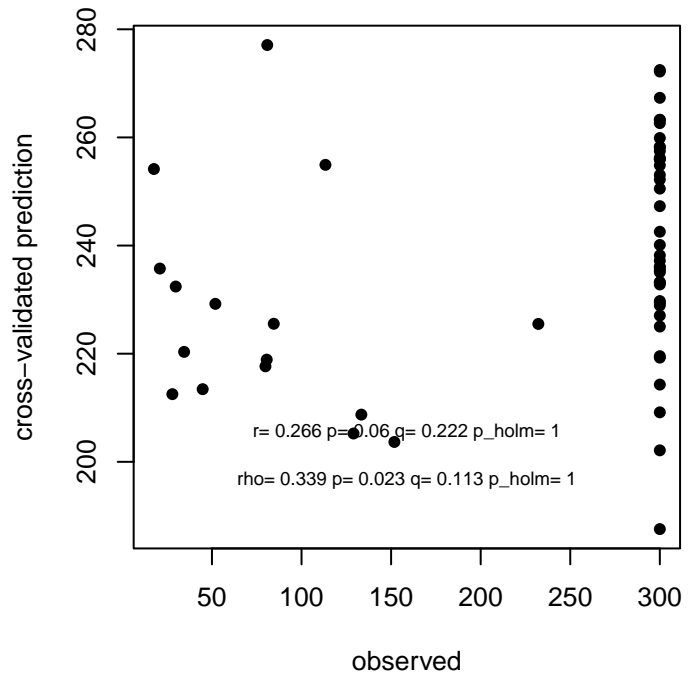

Peak\_Freq\_Down\_Med\_POD\_20084

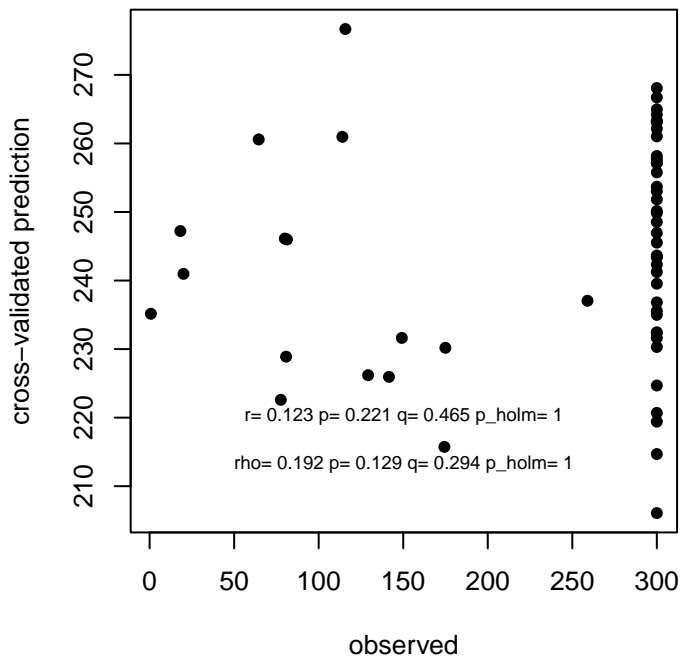

Peak\_Freq\_Down\_Med\_POD\_30145

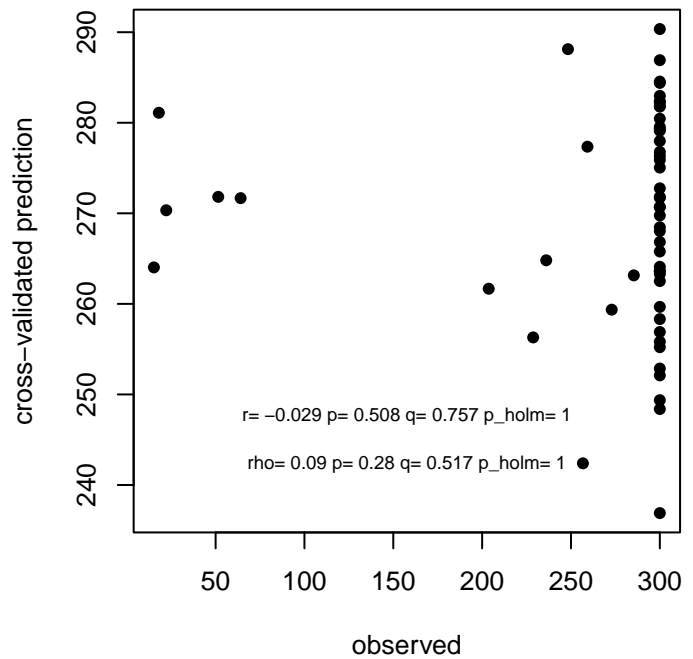

Peak\_Freq\_Down\_Med\_POD\_30171

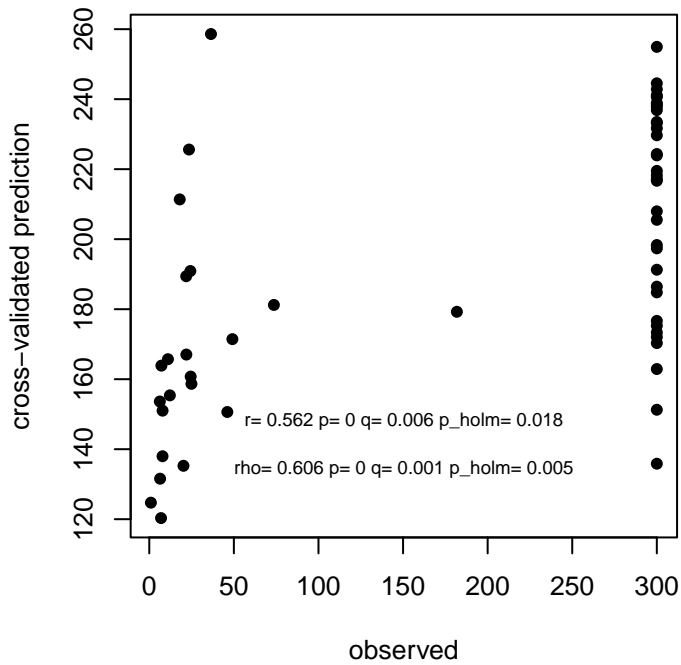

Peak\_Freq\_Down\_Min\_POD\_alldonors

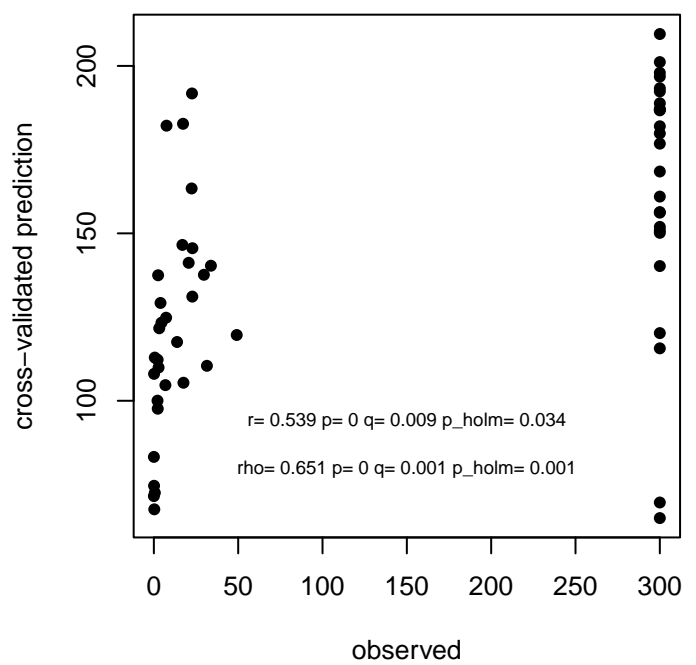

Peak\_Freq\_Up\_Med\_POD\_1083

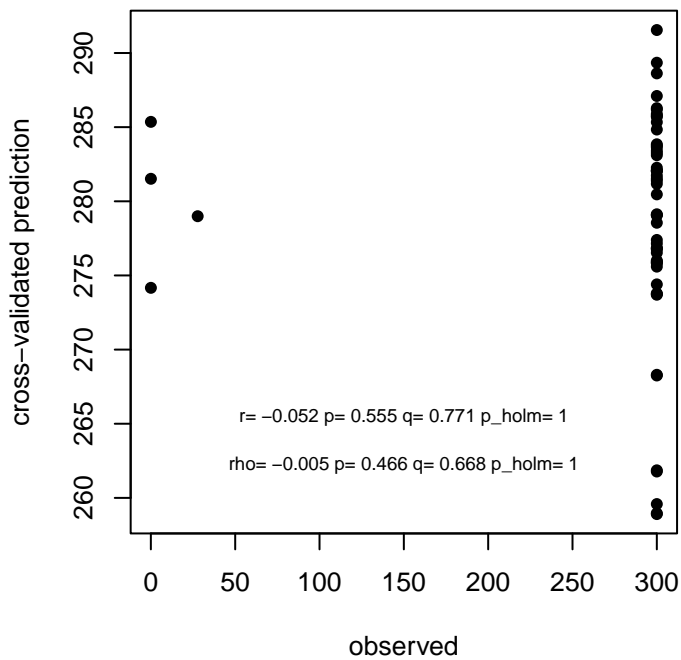

Peak\_Freq\_Up\_Med\_POD\_1118

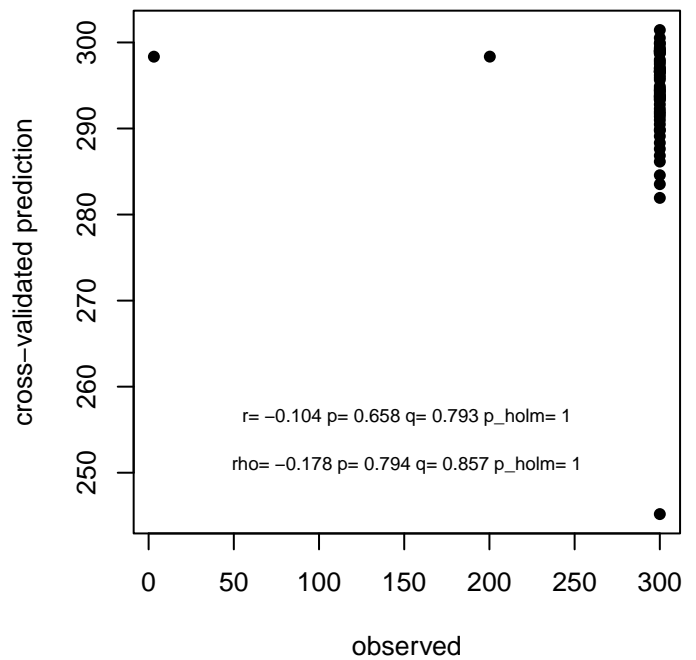

Peak\_Freq\_Up\_Med\_POD\_1309

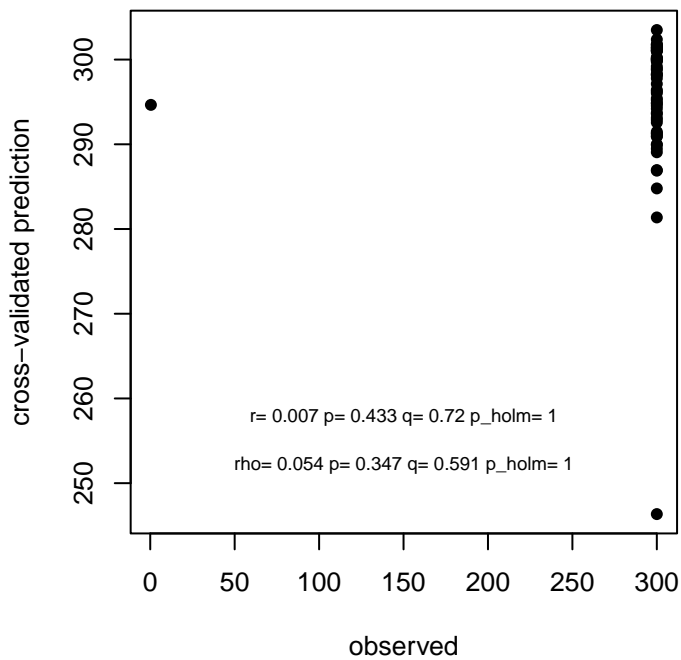

Peak\_Freq\_Up\_Med\_POD\_1368

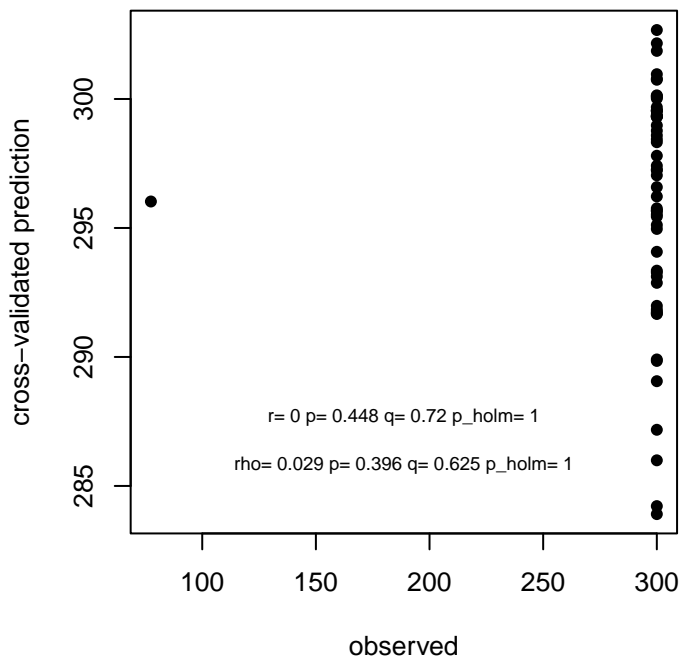

Peak\_Freq\_Up\_Med\_POD\_1392

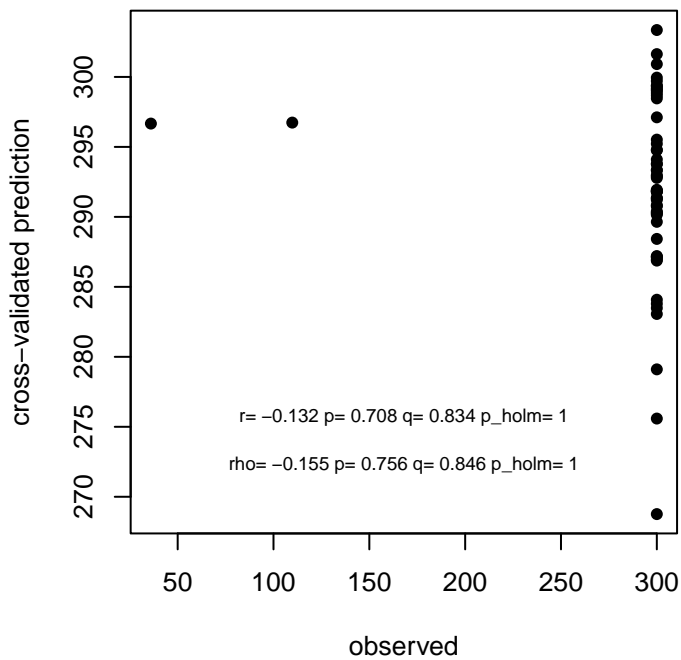

Peak\_Freq\_Up\_Med\_POD\_1434

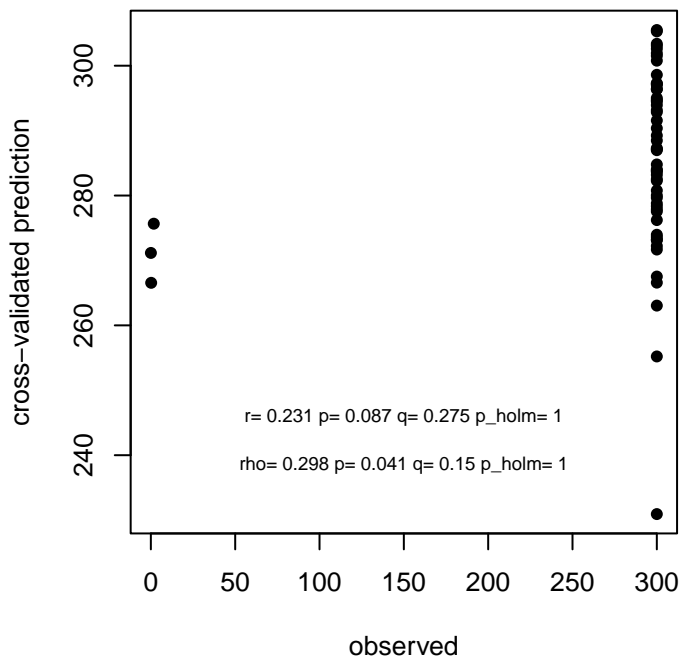

Peak\_Freq\_Up\_Med\_POD\_1516

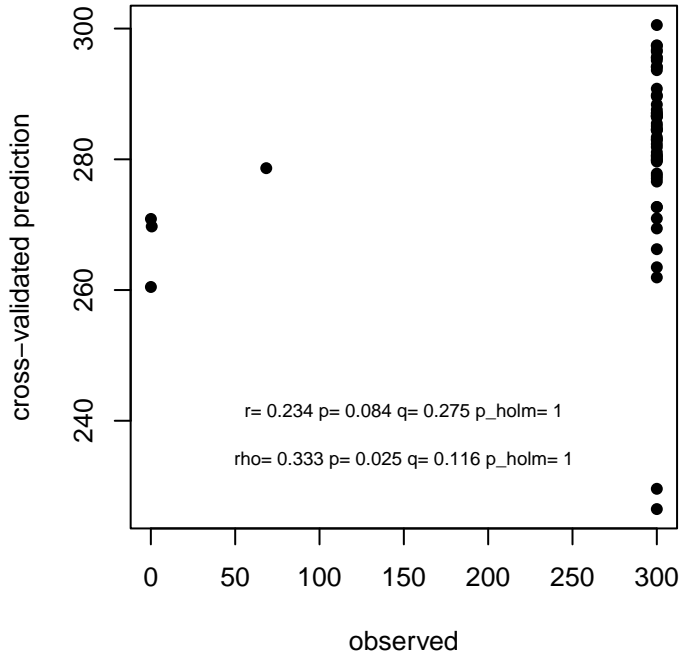

Peak\_Freq\_Up\_Med\_POD\_1518

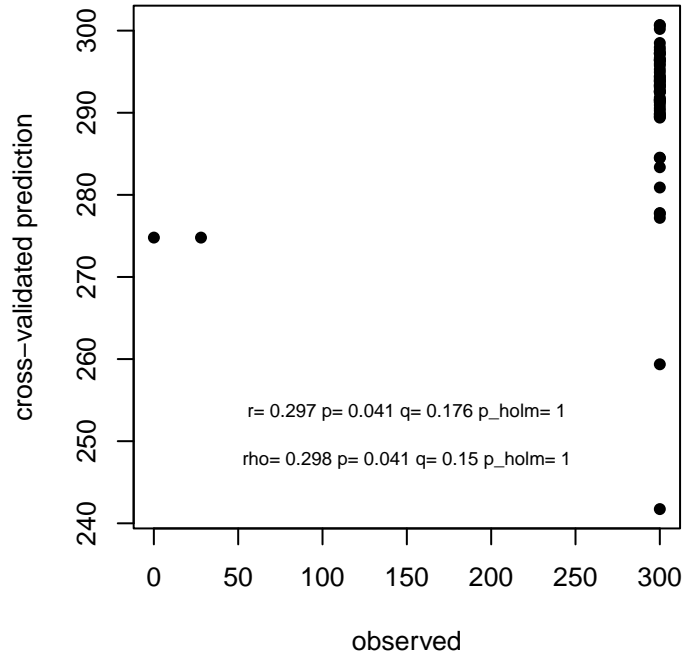

Peak\_Freq\_Up\_Med\_POD\_1535

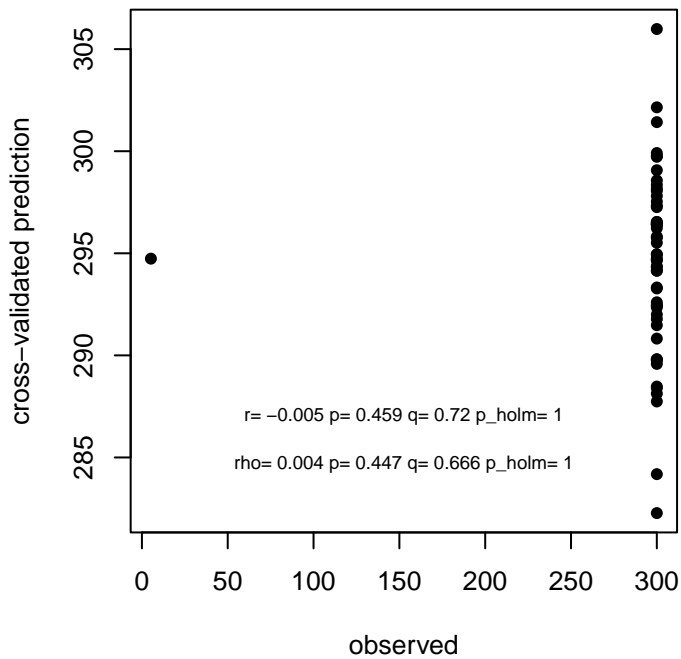

Peak\_Freq\_Up\_Med\_POD\_11235

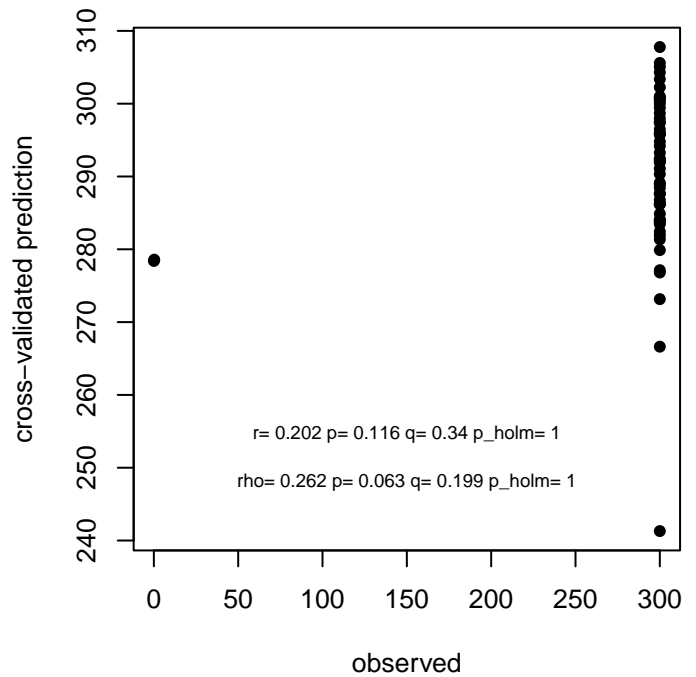

**Peak\_Freq\_Up\_Med\_POD\_20032**

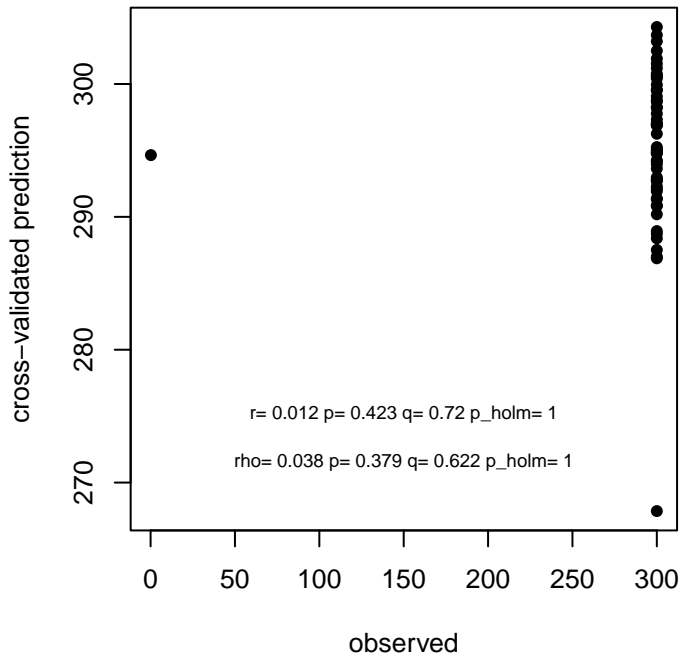

**Peak\_Freq\_Up\_Med\_POD\_30145**

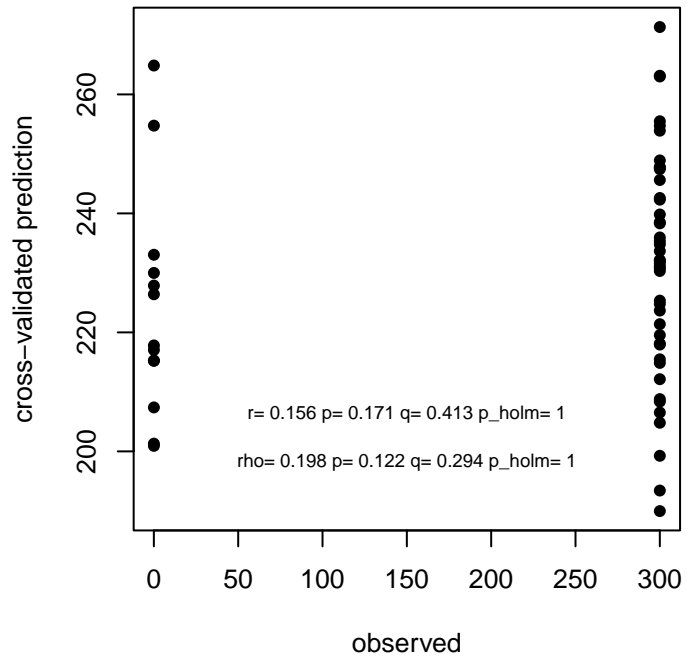

**Peak\_Freq\_Up\_Med\_POD\_30171**

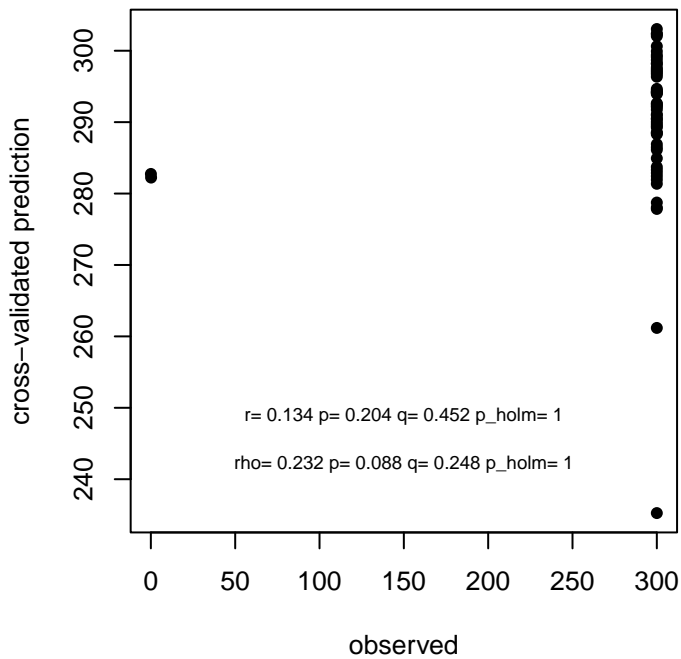

**Peak\_Freq\_Up\_Min\_POD\_alldonors**

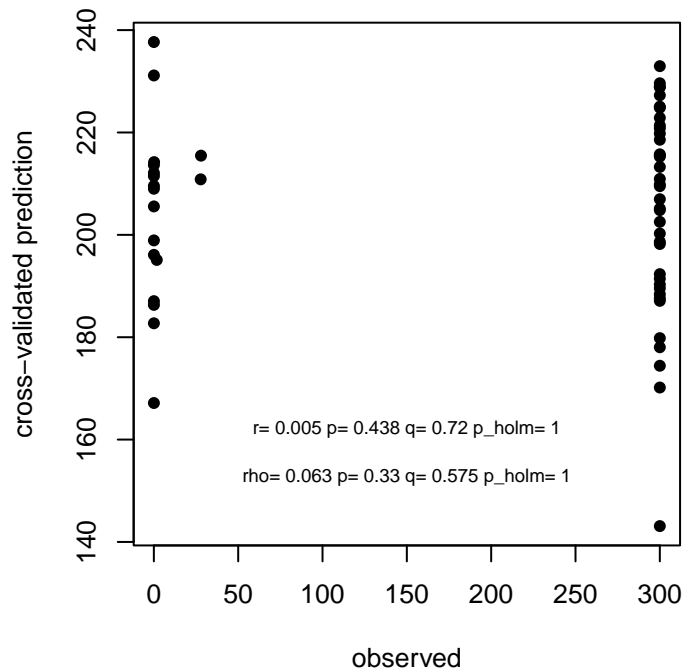

Peak\_Freq\_Zero\_Med\_POD\_1083

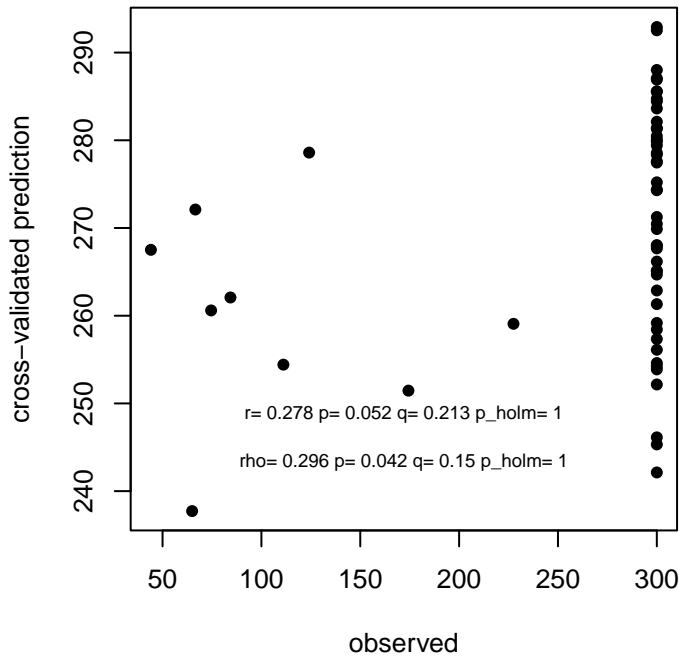

Peak\_Freq\_Zero\_Med\_POD\_1118

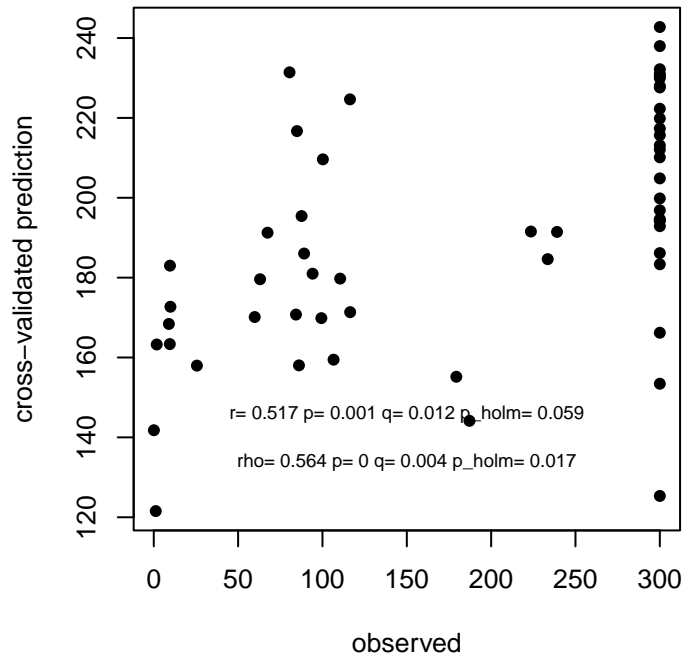

Peak\_Freq\_Zero\_Med\_POD\_1309

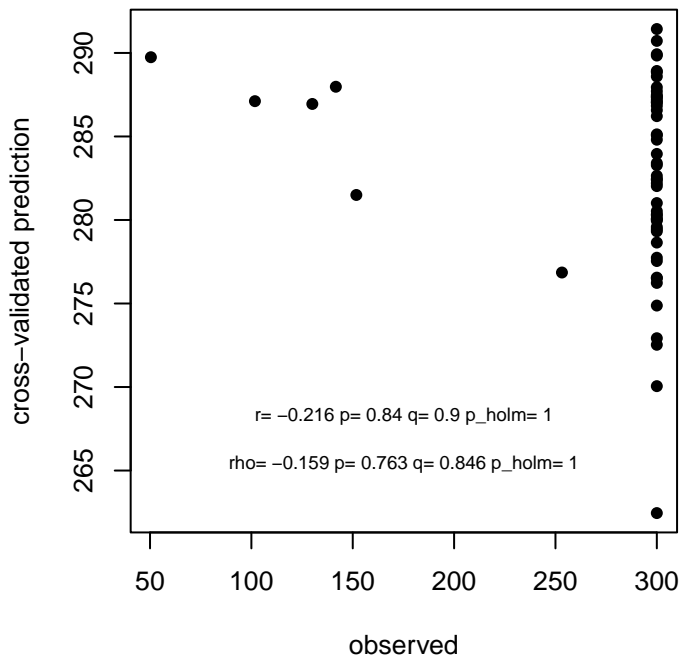

Peak\_Freq\_Zero\_Med\_POD\_1368

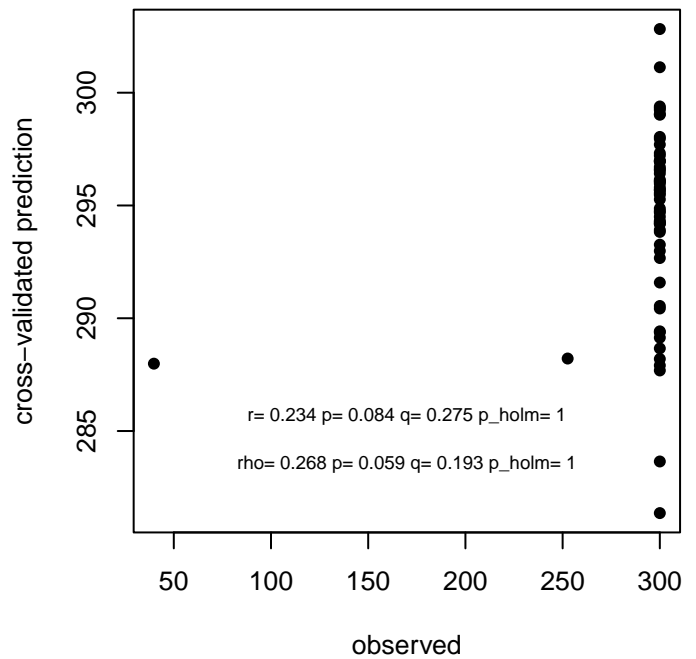

Peak\_Freq\_Zero\_Med\_POD\_1392

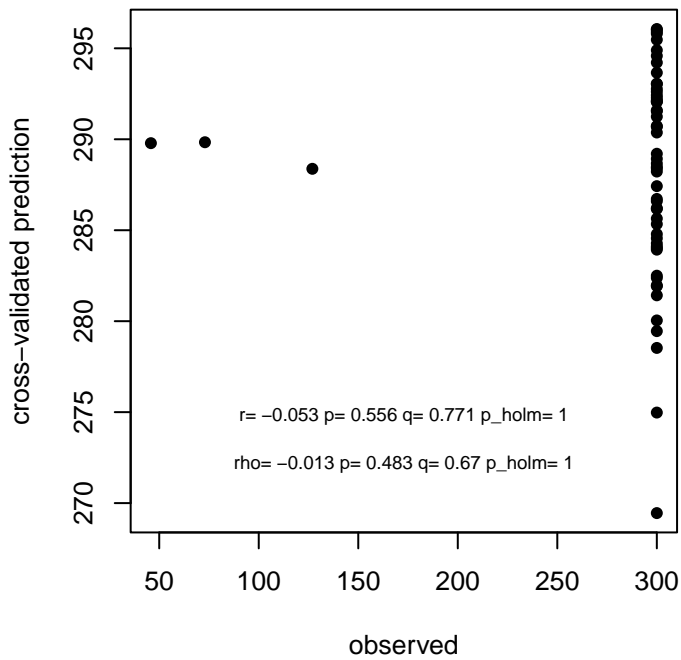

Peak\_Freq\_Zero\_Med\_POD\_1434

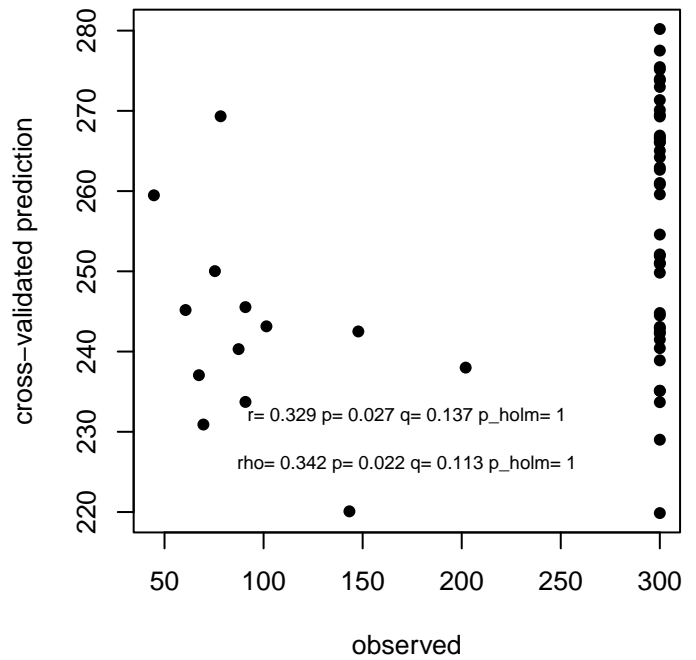

Peak\_Freq\_Zero\_Med\_POD\_1516

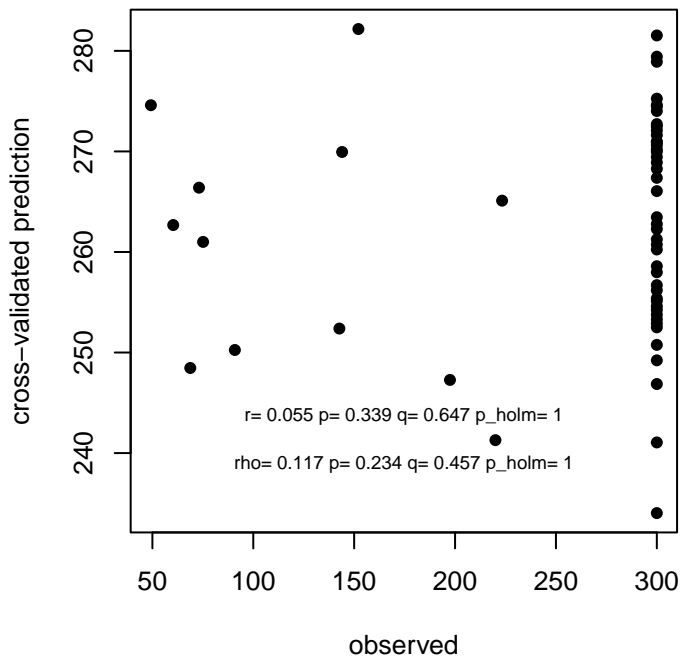

Peak\_Freq\_Zero\_Med\_POD\_1518

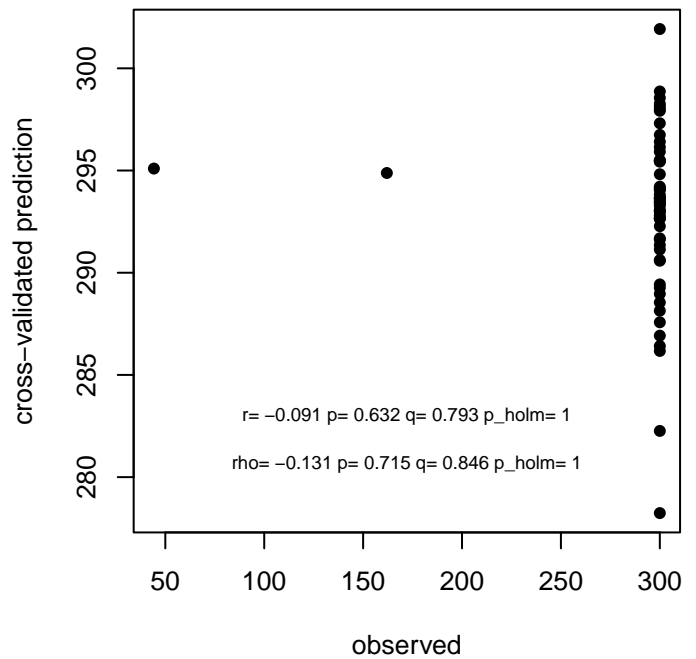

Peak\_Freq\_Zero\_Med\_POD\_1531

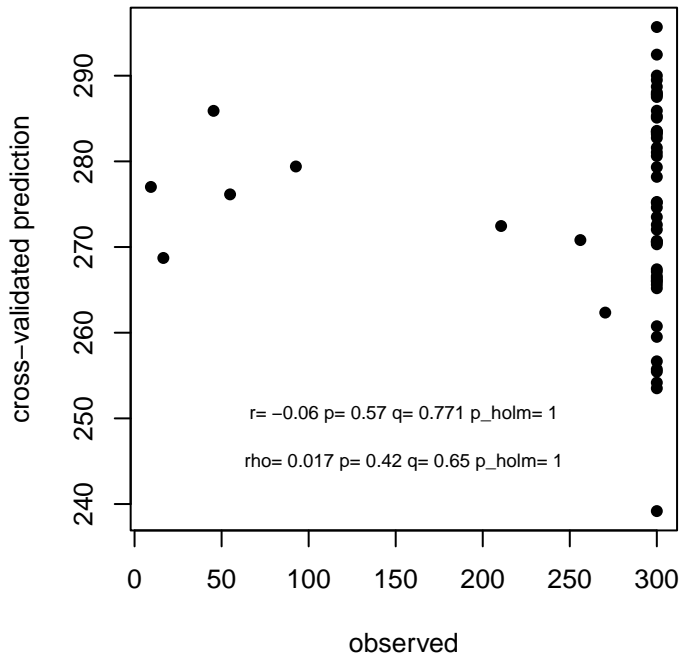

Peak\_Freq\_Zero\_Med\_POD\_1535

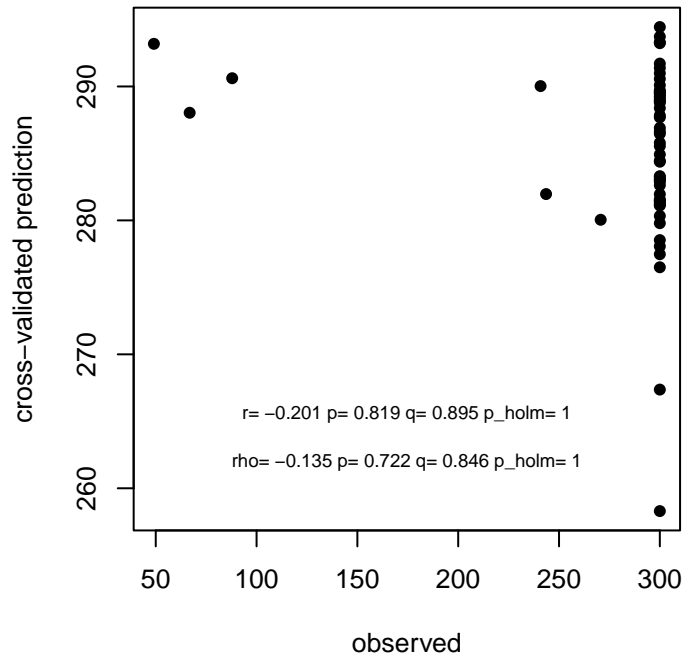

Peak\_Freq\_Zero\_Med\_POD\_1565

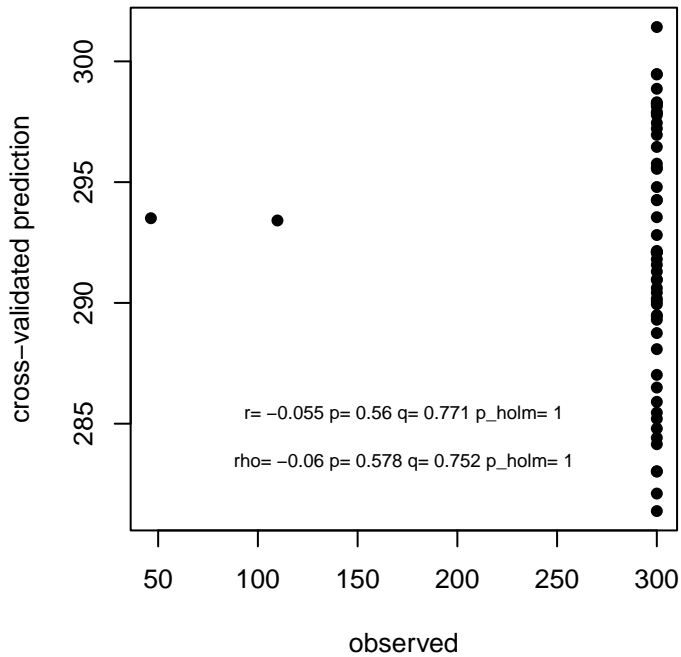

Peak\_Freq\_Zero\_Med\_POD\_11235

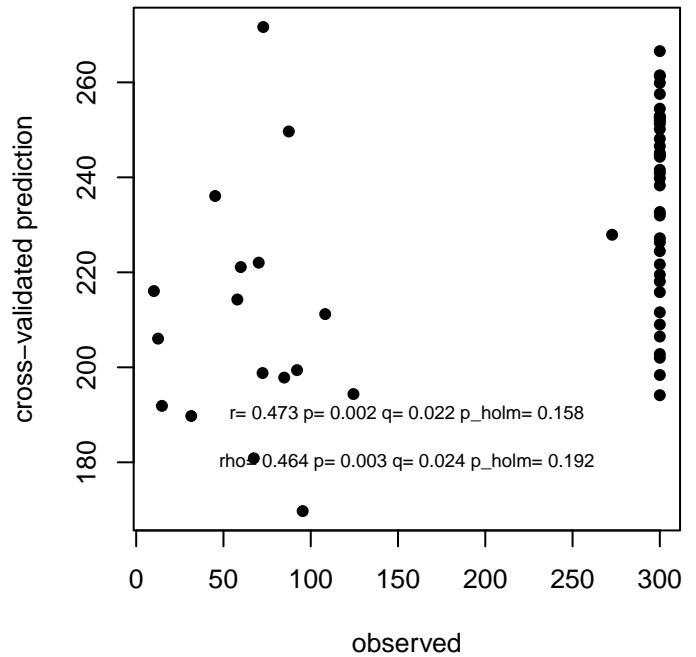



**Peak\_Freq\_Zero\_Med\_POD\_20032**

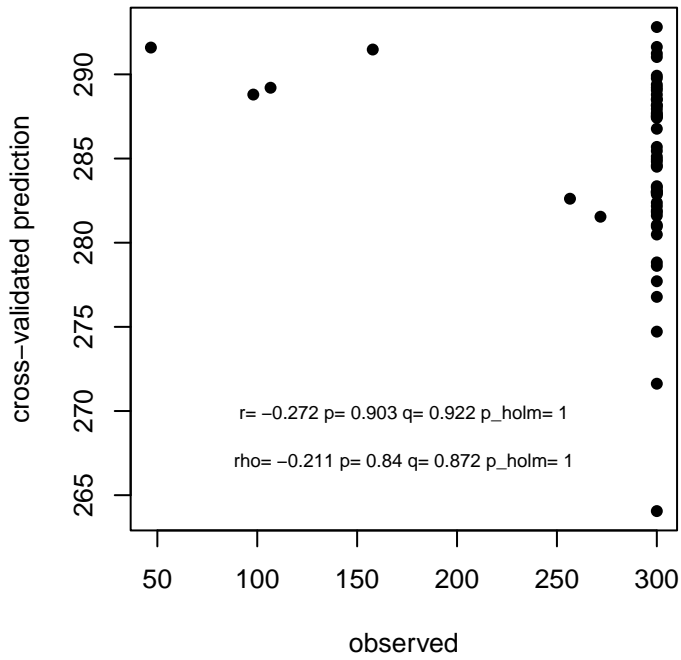

**Peak\_Freq\_Zero\_Med\_POD\_20084**

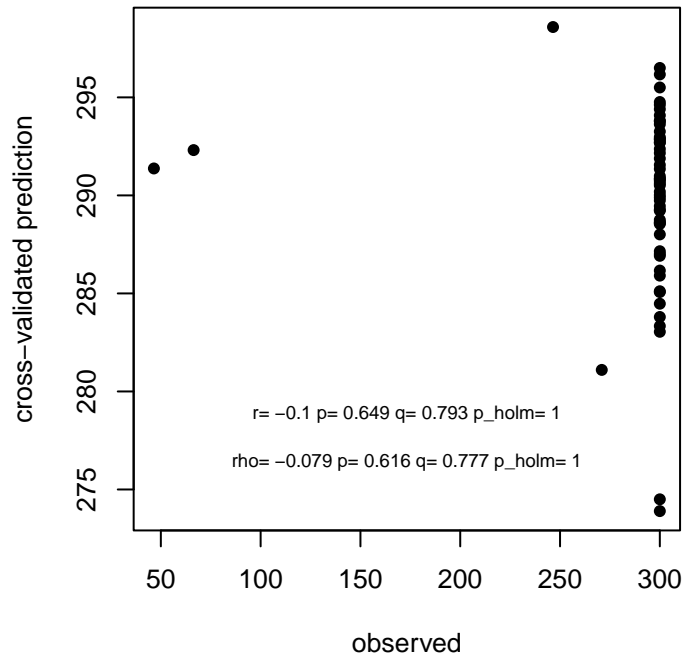

**Peak\_Freq\_Zero\_Med\_POD\_30145**

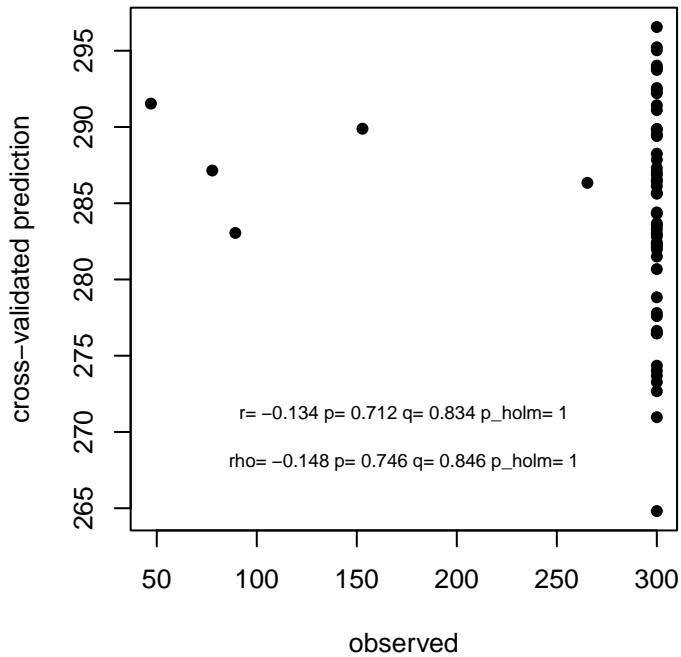

**Peak\_Freq\_Zero\_Med\_POD\_30171**

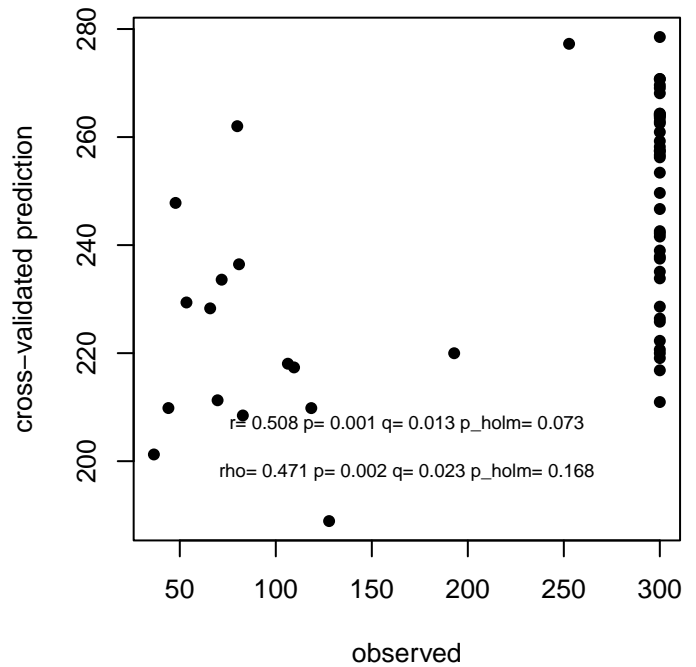

Peak\_Freq\_Zero\_Min\_POD\_alldonors

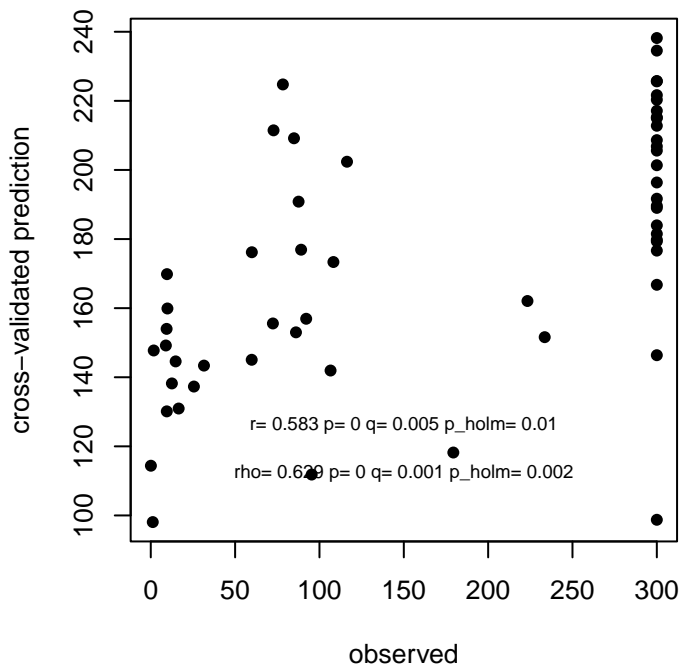

Total\_Cells\_Zero\_Med\_POD\_1083

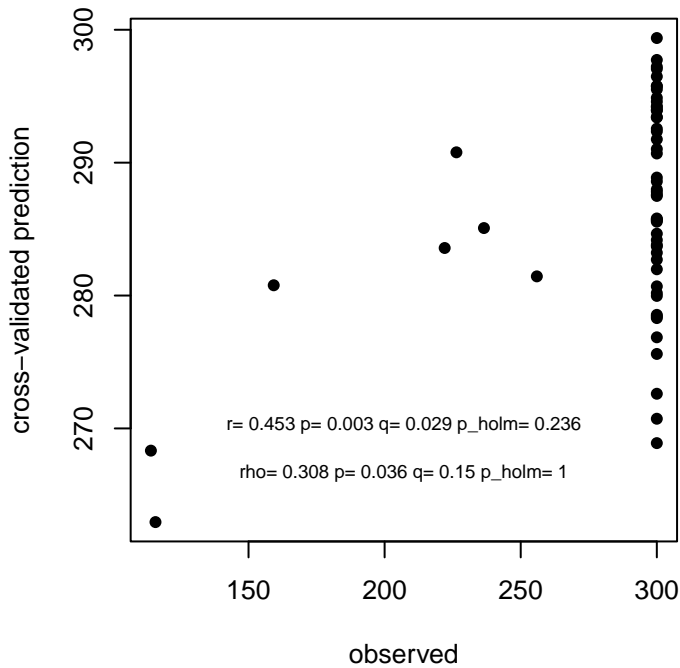

Total\_Cells\_Zero\_Med\_POD\_1118

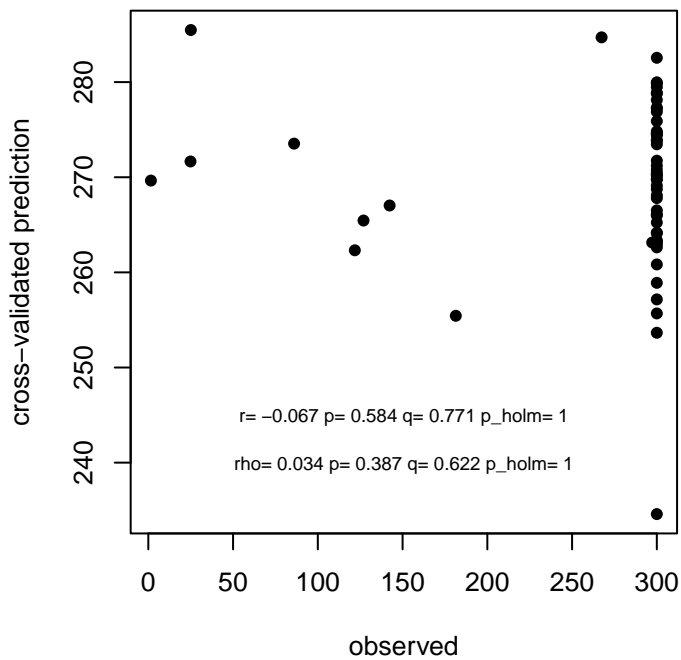

Total\_Cells\_Zero\_Med\_POD\_1309

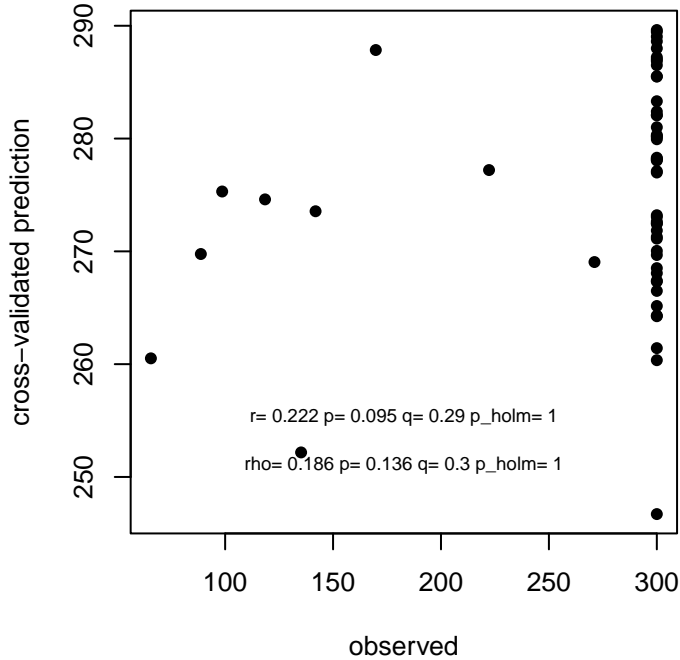

**Total\_Cells\_Zero\_Med\_POD\_1368**

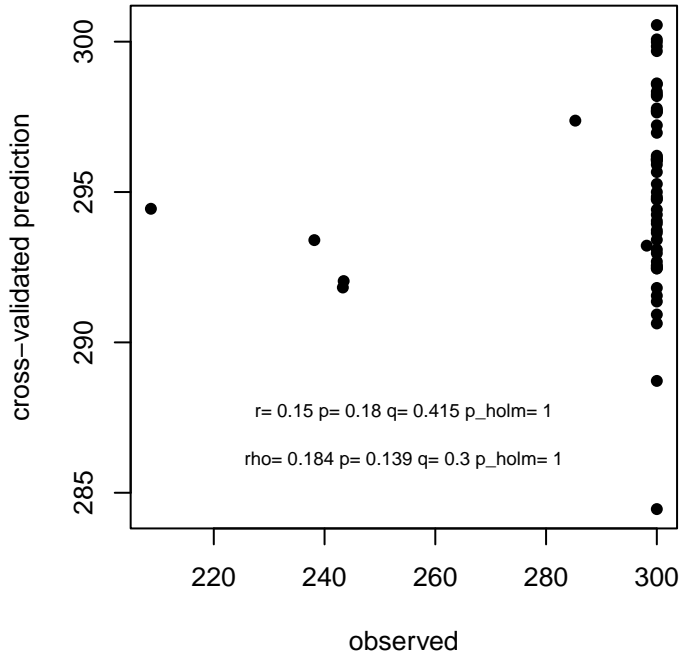

**Total\_Cells\_Zero\_Med\_POD\_1392**

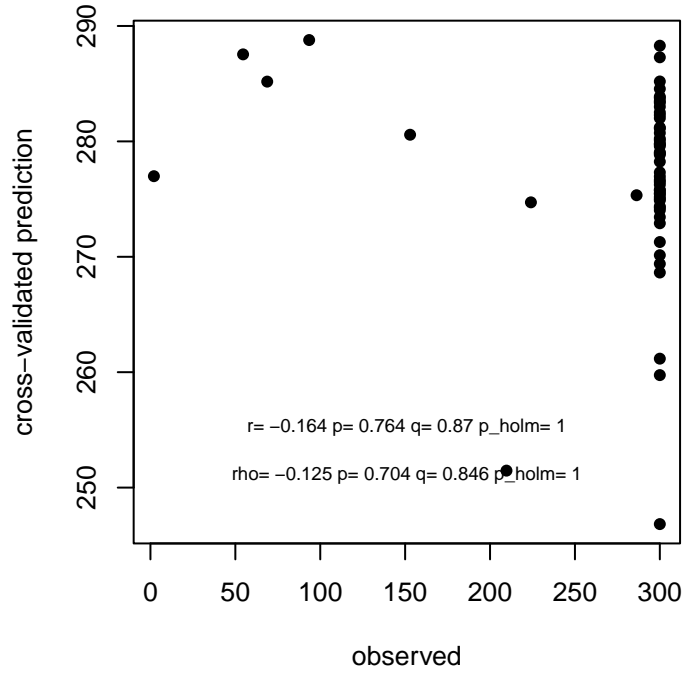

**Total\_Cells\_Zero\_Med\_POD\_1434**

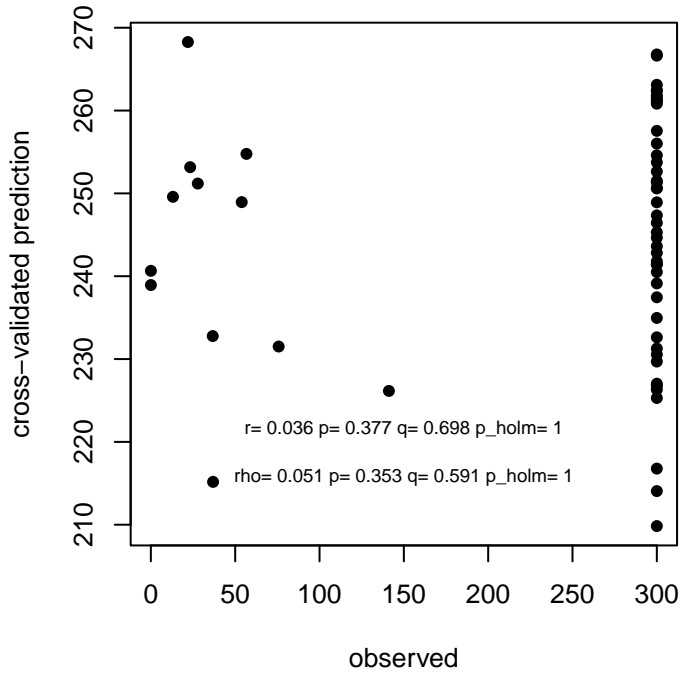

**Total\_Cells\_Zero\_Med\_POD\_1516**

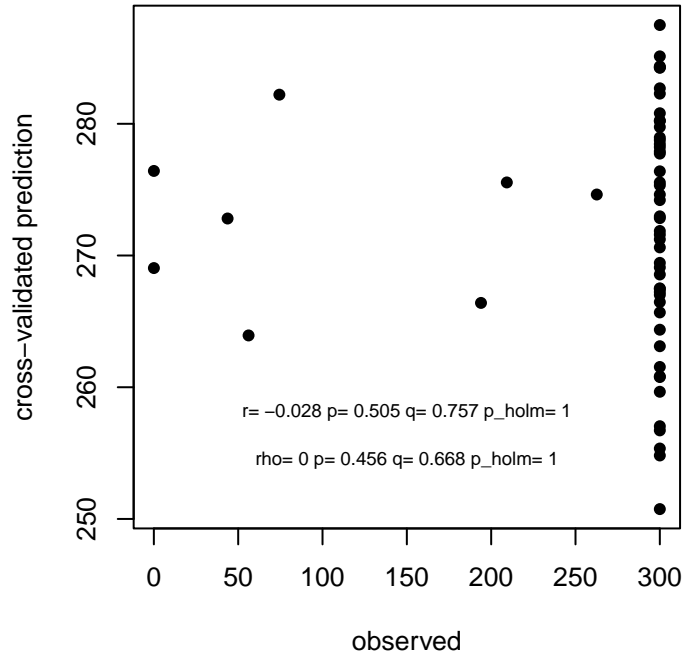

**Total\_Cells\_Zero\_Med\_POD\_1518**

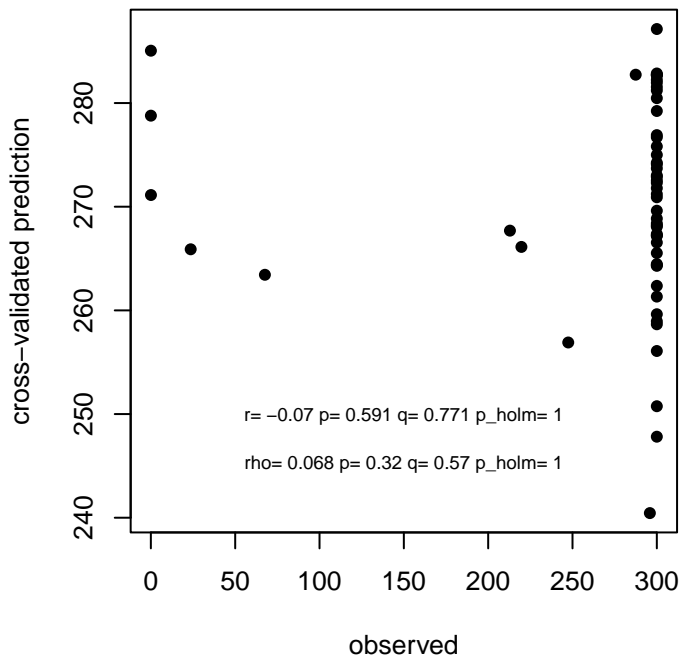

**Total\_Cells\_Zero\_Med\_POD\_1531**

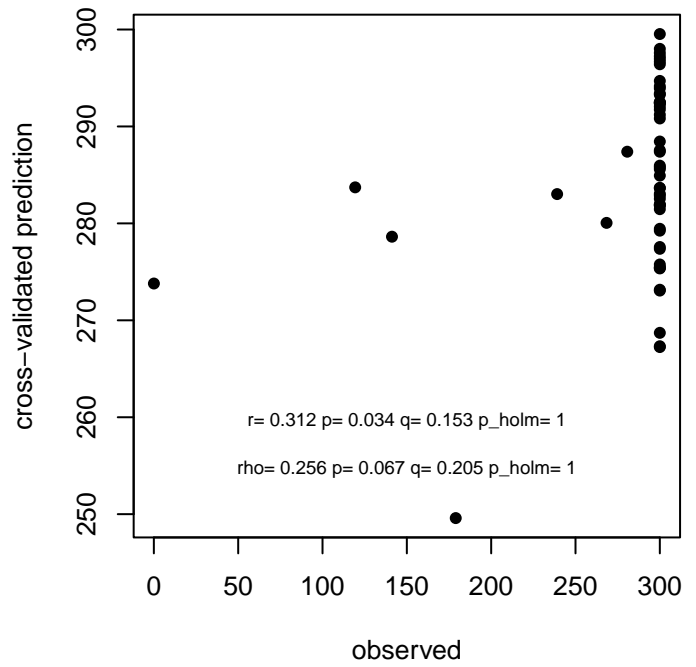

**Total\_Cells\_Zero\_Med\_POD\_1535**

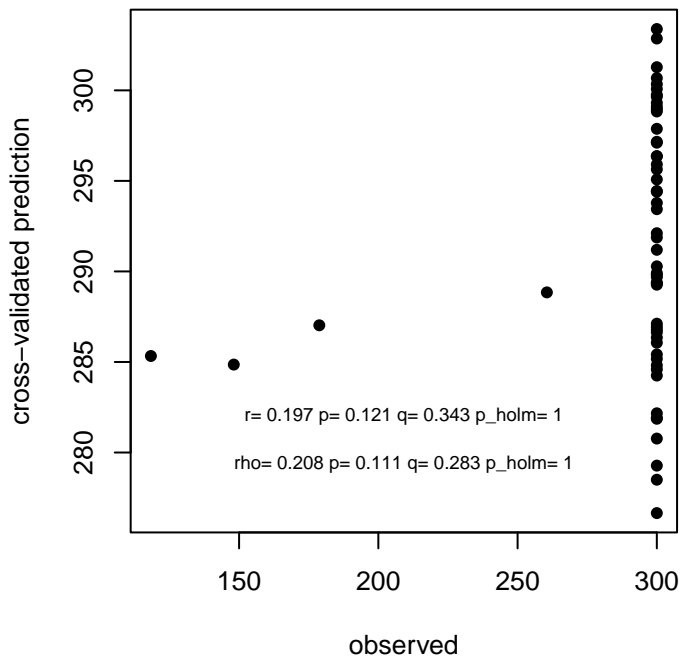

**Total\_Cells\_Zero\_Med\_POD\_1565**

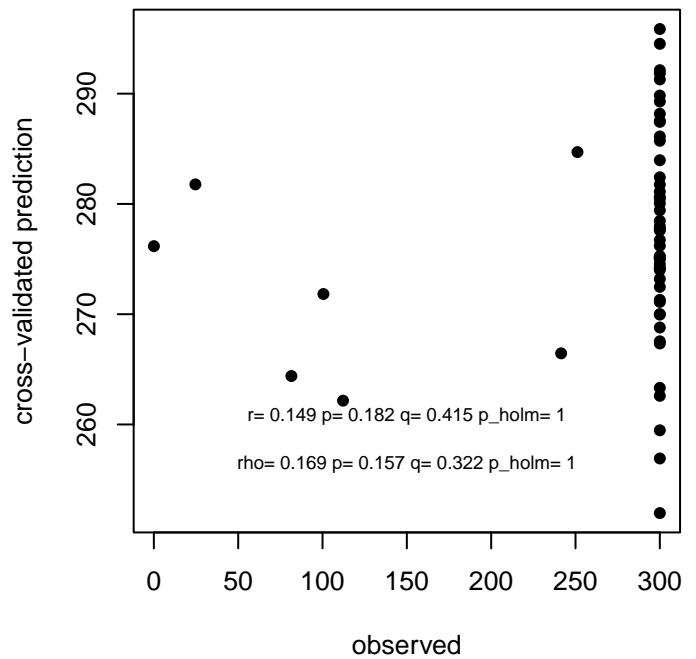

**Total\_Cells\_Zero\_Med\_POD\_11235**

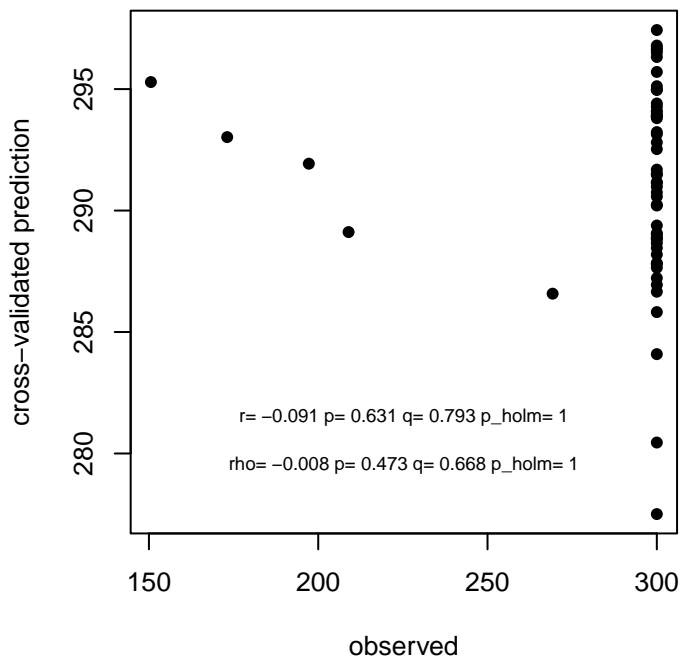

**Total\_Cells\_Zero\_Med\_POD\_20032**

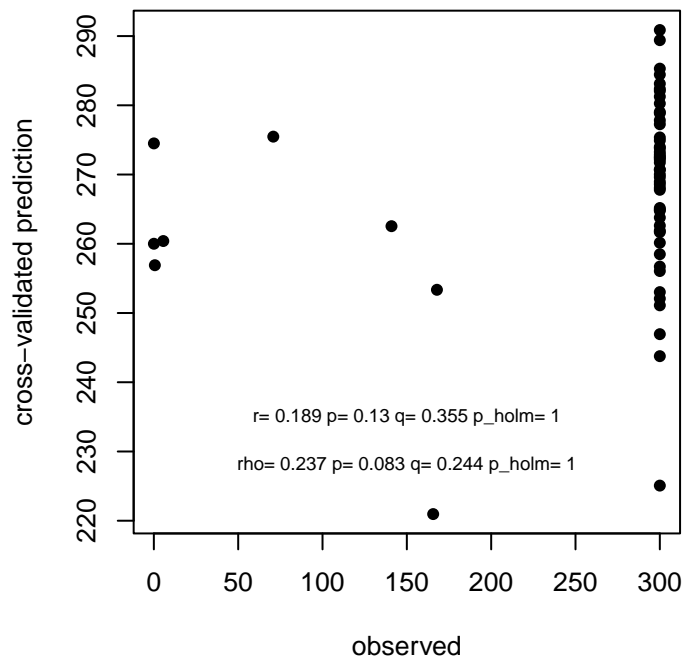

**Total\_Cells\_Zero\_Med\_POD\_20084**

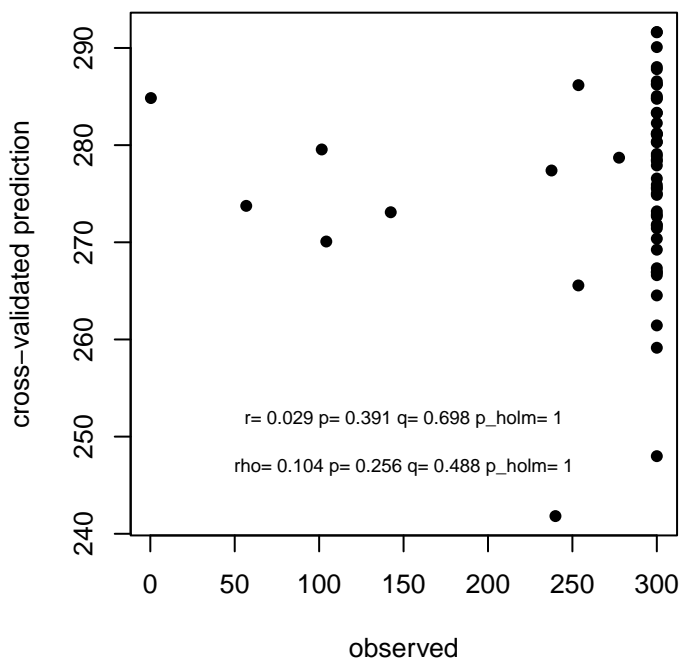

**Total\_Cells\_Zero\_Med\_POD\_30145**

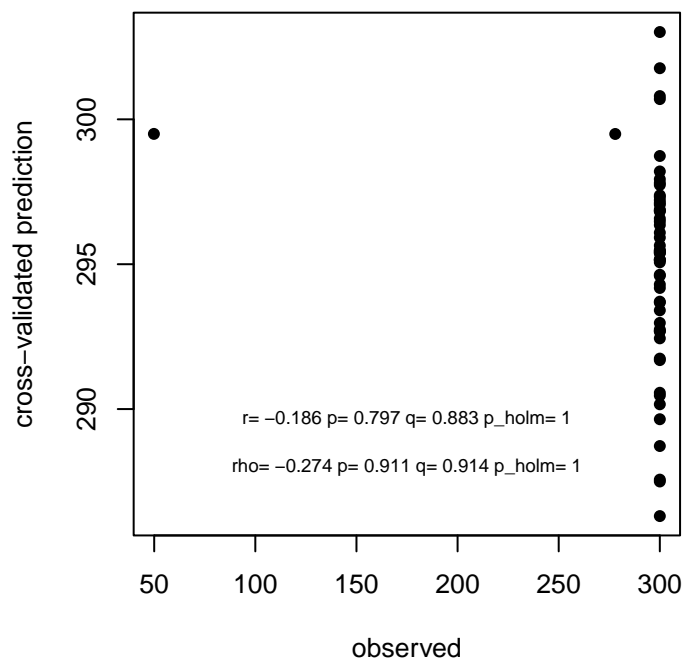

Total\_Cells\_Zero\_Med\_POD\_30171

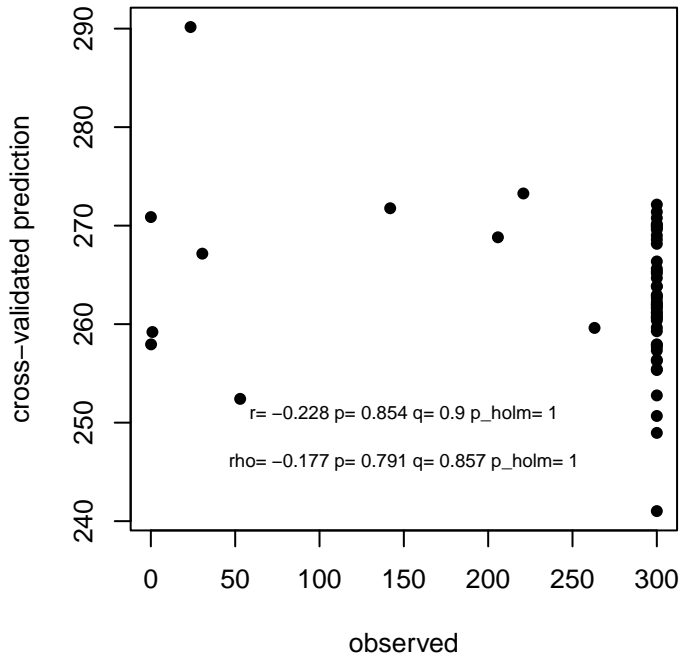

Peak\_Freq\_Zero\_Min\_POD\_alldonors

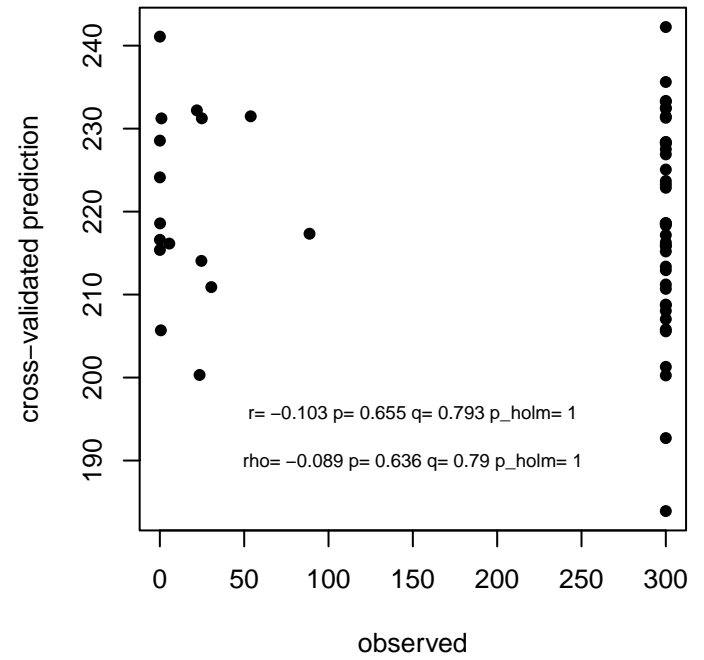

Supplement: 40246_2024_665_MOESM7_ESM.pdf [file 40246_2024_665_MOESM7_ESM.pdf]
